# Supplementary material for: Evaluating differences in density estimation for central Iowa butterflies using two methodologies
Source: PeerJ journal article supplement (doi:10.7717/peerj.16165), 2023-10-09
Supplement: ButterflyDistData.xlsx [file ButterflyDistData.xlsx]

## Sheet: All Species
Property	Date	Species	Distance
Marietta Sand Prairie	2014-08-03	American Lady	0.5
Marietta Sand Prairie	2014-08-14	American Lady	0.5
McCoy WMA	2014-07-30	American Lady	0.5
McCoy WMA	2014-07-29	American Lady	1.375
Marietta Sand Prairie	2014-08-03	American Lady	2.125
Marietta Sand Prairie	2014-08-03	American Snout	0.5
Marietta Sand Prairie	2014-08-14	American Snout	0.5
McCoy WMA	2014-08-02	American Snout	0.5
Marietta Sand Prairie	2014-07-24	Black Dash	1.375
Marietta Sand Prairie	2014-08-22	Cabbage White	0.5
McCoy WMA	2014-08-02	Cabbage White	0.5
McCoy WMA	2014-08-02	Cabbage White	0.5
McCoy WMA	2014-08-02	Cabbage White	0.5
McCoy WMA	2014-08-11	Cabbage White	0.5
McCoy WMA	2014-08-11	Cabbage White	0.5
McCoy WMA	2014-08-13	Cabbage White	0.5
McCoy WMA	2014-08-21	Cabbage White	0.5
Rock Creek Marsh	2014-08-03	Cabbage White	0.5
Rock Creek Marsh	2014-08-03	Cabbage White	0.5
Rock Creek Marsh	2014-08-17	Cabbage White	0.5
Rock Creek Marsh	2014-08-17	Cabbage White	0.5
Rock Creek Marsh	2014-08-17	Cabbage White	0.5
Rock Creek Marsh	2014-08-17	Cabbage White	0.5
Rock Creek Marsh	2014-08-17	Cabbage White	0.5
Rock Creek Marsh	2014-08-17	Cabbage White	0.5
Rock Creek Marsh	2014-08-22	Cabbage White	0.5
Rock Creek Marsh	2014-08-22	Cabbage White	0.5
Rock Creek Marsh	2014-08-22	Cabbage White	0.5
Rock Creek Marsh	2014-08-23	Cabbage White	0.5
Rock Creek Marsh	2014-08-23	Cabbage White	0.5
Rock Creek Marsh	2014-08-23	Cabbage White	0.5
Rock Creek Marsh	2014-08-23	Cabbage White	0.5
Rock Creek Marsh	2014-08-24	Cabbage White	0.5
Harrier Marsh	2014-08-02	Cabbage White	1.375
Marietta Sand Prairie	2014-08-03	Cabbage White	1.375
Marietta Sand Prairie	2014-08-03	Cabbage White	1.375
Marietta Sand Prairie	2014-08-22	Cabbage White	1.375
McCoy WMA	2014-07-29	Cabbage White	1.375
McCoy WMA	2014-07-29	Cabbage White	1.375
McCoy WMA	2014-08-02	Cabbage White	1.375
McCoy WMA	2014-08-02	Cabbage White	1.375
McCoy WMA	2014-08-13	Cabbage White	1.375
McCoy WMA	2014-08-19	Cabbage White	1.375
McCoy WMA	2014-08-21	Cabbage White	1.375
Rock Creek Marsh	2014-08-03	Cabbage White	1.375
Rock Creek Marsh	2014-08-10	Cabbage White	1.375
Rock Creek Marsh	2014-08-10	Cabbage White	1.375
Rock Creek Marsh	2014-08-10	Cabbage White	1.375
Rock Creek Marsh	2014-08-17	Cabbage White	1.375
Rock Creek Marsh	2014-08-17	Cabbage White	1.375
Rock Creek Marsh	2014-08-17	Cabbage White	1.375
Rock Creek Marsh	2014-08-17	Cabbage White	1.375
Rock Creek Marsh	2014-08-17	Cabbage White	1.375
Rock Creek Marsh	2014-08-17	Cabbage White	1.375
Rock Creek Marsh	2014-08-24	Cabbage White	1.375
Rock Creek Marsh	2014-08-24	Cabbage White	1.375
Rock Creek Marsh	2014-08-24	Cabbage White	1.375
Harrier Marsh	2014-08-02	Cabbage White	2.125
Harrier Marsh	2014-08-05	Cabbage White	2.125
McCoy WMA	2014-07-29	Cabbage White	2.125
McCoy WMA	2014-07-29	Cabbage White	2.125
McCoy WMA	2014-07-29	Cabbage White	2.125
McCoy WMA	2014-08-04	Cabbage White	2.125
Rock Creek Marsh	2014-07-30	Cabbage White	2.125
Rock Creek Marsh	2014-07-30	Cabbage White	2.125
Rock Creek Marsh	2014-08-03	Cabbage White	2.125
Rock Creek Marsh	2014-08-03	Cabbage White	2.125
Rock Creek Marsh	2014-08-04	Cabbage White	2.125
Rock Creek Marsh	2014-08-04	Cabbage White	2.125
Rock Creek Marsh	2014-08-04	Cabbage White	2.125
Rock Creek Marsh	2014-08-10	Cabbage White	2.125
Rock Creek Marsh	2014-08-10	Cabbage White	2.125
Rock Creek Marsh	2014-08-17	Cabbage White	2.125
Rock Creek Marsh	2014-08-17	Cabbage White	2.125
Rock Creek Marsh	2014-08-17	Cabbage White	2.125
Rock Creek Marsh	2014-08-17	Cabbage White	2.125
Rock Creek Marsh	2014-08-17	Cabbage White	2.125
Rock Creek Marsh	2014-08-22	Cabbage White	2.125
Rock Creek Marsh	2014-08-23	Cabbage White	2.125
Rock Creek Marsh	2014-08-24	Cabbage White	2.125
Rock Creek Marsh	2014-08-24	Cabbage White	2.125
Rock Creek Marsh	2014-08-24	Cabbage White	2.125
Harrier Marsh	2014-08-05	Cabbage White	3.75
McCoy WMA	2014-07-29	Cabbage White	3.75
McCoy WMA	2014-08-21	Cabbage White	3.75
Rock Creek Marsh	2014-07-30	Cabbage White	3.75
Rock Creek Marsh	2014-08-03	Cabbage White	3.75
Rock Creek Marsh	2014-08-04	Cabbage White	3.75
Rock Creek Marsh	2014-08-04	Cabbage White	3.75
Rock Creek Marsh	2014-08-10	Cabbage White	3.75
Rock Creek Marsh	2014-08-10	Cabbage White	3.75
Rock Creek Marsh	2014-08-10	Cabbage White	3.75
Rock Creek Marsh	2014-08-17	Cabbage White	3.75
Rock Creek Marsh	2014-08-17	Cabbage White	3.75
Rock Creek Marsh	2014-08-17	Cabbage White	3.75
Rock Creek Marsh	2014-08-17	Cabbage White	3.75
Rock Creek Marsh	2014-08-24	Cabbage White	3.75
Rock Creek Marsh	2014-08-24	Cabbage White	3.75
McCoy WMA	2014-08-02	Cabbage White	7.5
McCoy WMA	2014-08-19	Cabbage White	7.5
McCoy WMA	2014-08-21	Cabbage White	7.5
Rock Creek Marsh	2014-07-30	Cabbage White	7.5
Rock Creek Marsh	2014-07-30	Cabbage White	7.5
Rock Creek Marsh	2014-08-04	Cabbage White	7.5
Rock Creek Marsh	2014-08-17	Cabbage White	7.5
Rock Creek Marsh	2014-08-17	Cabbage White	7.5
Rock Creek Marsh	2014-08-22	Cabbage White	7.5
Rock Creek Marsh	2014-08-24	Cabbage White	7.5
Harrier Marsh	2014-08-21	Cabbage White	17.5
Marietta Sand Prairie	2014-08-16	Cabbage White	17.5
McCoy WMA	2014-08-02	Cabbage White	17.5
Rock Creek Marsh	2014-07-30	Cabbage White	17.5
Rock Creek Marsh	2014-08-17	Cabbage White	17.5
Rock Creek Marsh	2014-08-17	Cabbage White	17.5
Rock Creek Marsh	2014-08-23	Cabbage White	17.5
Rock Creek Marsh	2014-08-24	Cabbage White	17.5
Marietta Sand Prairie	2014-08-05	Cabbage White	37.5
McCoy WMA	2014-07-29	Cabbage White	37.5
McCoy WMA	2014-08-02	Cabbage White	37.5
McCoy WMA	2014-08-21	Cabbage White	37.5
Rock Creek Marsh	2014-08-03	Cabbage White	37.5
Rock Creek Marsh	2014-08-10	Cabbage White	37.5
Rock Creek Marsh	2014-08-10	Cabbage White	37.5
Rock Creek Marsh	2014-08-17	Cabbage White	37.5
McCoy WMA	2014-08-02	Cabbage White	75
McCoy WMA	2014-08-21	Cabbage White	75
Harrier Marsh	2014-07-29	Clouded Sulphur	0.5
Harrier Marsh	2014-07-29	Clouded Sulphur	0.5
Harrier Marsh	2014-08-02	Clouded Sulphur	0.5
Harrier Marsh	2014-08-05	Clouded Sulphur	0.5
Harrier Marsh	2014-08-05	Clouded Sulphur	0.5
Harrier Marsh	2014-08-18	Clouded Sulphur	0.5
Marietta Sand Prairie	2014-08-02	Clouded Sulphur	0.5
McCoy WMA	2014-07-29	Clouded Sulphur	0.5
McCoy WMA	2014-07-29	Clouded Sulphur	0.5
McCoy WMA	2014-07-30	Clouded Sulphur	0.5
McCoy WMA	2014-07-30	Clouded Sulphur	0.5
McCoy WMA	2014-07-30	Clouded Sulphur	0.5
McCoy WMA	2014-08-02	Clouded Sulphur	0.5
McCoy WMA	2014-08-04	Clouded Sulphur	0.5
McCoy WMA	2014-08-11	Clouded Sulphur	0.5
McCoy WMA	2014-08-13	Clouded Sulphur	0.5
McCoy WMA	2014-08-19	Clouded Sulphur	0.5
McCoy WMA	2014-08-19	Clouded Sulphur	0.5
McCoy WMA	2014-08-19	Clouded Sulphur	0.5
McCoy WMA	2014-08-21	Clouded Sulphur	0.5
McCoy WMA	2014-08-21	Clouded Sulphur	0.5
Harrier Marsh	2014-08-11	Clouded Sulphur	0.5
Harrier Marsh	2014-08-11	Clouded Sulphur	0.5
Harrier Marsh	2014-08-02	Clouded Sulphur	1.375
Harrier Marsh	2014-08-05	Clouded Sulphur	1.375
Harrier Marsh	2014-08-05	Clouded Sulphur	1.375
Harrier Marsh	2014-08-18	Clouded Sulphur	1.375
Marietta Sand Prairie	2014-08-02	Clouded Sulphur	1.375
Marietta Sand Prairie	2014-08-22	Clouded Sulphur	1.375
McCoy WMA	2014-07-29	Clouded Sulphur	1.375
McCoy WMA	2014-07-30	Clouded Sulphur	1.375
McCoy WMA	2014-07-30	Clouded Sulphur	1.375
McCoy WMA	2014-07-30	Clouded Sulphur	1.375
McCoy WMA	2014-08-02	Clouded Sulphur	1.375
McCoy WMA	2014-08-02	Clouded Sulphur	1.375
McCoy WMA	2014-08-04	Clouded Sulphur	1.375
McCoy WMA	2014-08-11	Clouded Sulphur	1.375
McCoy WMA	2014-08-13	Clouded Sulphur	1.375
McCoy WMA	2014-08-13	Clouded Sulphur	1.375
McCoy WMA	2014-08-19	Clouded Sulphur	1.375
McCoy WMA	2014-08-19	Clouded Sulphur	1.375
Harrier Marsh	2014-08-11	Clouded Sulphur	1.375
Harrier Marsh	2014-08-11	Clouded Sulphur	1.375
Harrier Marsh	2014-07-29	Clouded Sulphur	2.125
Harrier Marsh	2014-07-29	Clouded Sulphur	2.125
Harrier Marsh	2014-08-02	Clouded Sulphur	2.125
Harrier Marsh	2014-08-18	Clouded Sulphur	2.125
Harrier Marsh	2014-08-18	Clouded Sulphur	2.125
Harrier Marsh	2014-08-18	Clouded Sulphur	2.125
Harrier Marsh	2014-08-18	Clouded Sulphur	2.125
Marietta Sand Prairie	2014-08-14	Clouded Sulphur	2.125
Marietta Sand Prairie	2014-08-14	Clouded Sulphur	2.125
McCoy WMA	2014-07-29	Clouded Sulphur	2.125
McCoy WMA	2014-07-29	Clouded Sulphur	2.125
McCoy WMA	2014-07-29	Clouded Sulphur	2.125
McCoy WMA	2014-07-29	Clouded Sulphur	2.125
McCoy WMA	2014-07-30	Clouded Sulphur	2.125
McCoy WMA	2014-08-02	Clouded Sulphur	2.125
McCoy WMA	2014-08-02	Clouded Sulphur	2.125
McCoy WMA	2014-08-02	Clouded Sulphur	2.125
McCoy WMA	2014-08-04	Clouded Sulphur	2.125
McCoy WMA	2014-08-04	Clouded Sulphur	2.125
McCoy WMA	2014-08-04	Clouded Sulphur	2.125
McCoy WMA	2014-08-13	Clouded Sulphur	2.125
McCoy WMA	2014-08-13	Clouded Sulphur	2.125
McCoy WMA	2014-08-13	Clouded Sulphur	2.125
McCoy WMA	2014-08-19	Clouded Sulphur	2.125
McCoy WMA	2014-08-19	Clouded Sulphur	2.125
McCoy WMA	2014-08-21	Clouded Sulphur	2.125
Harrier Marsh	2014-08-11	Clouded Sulphur	2.125
Harrier Marsh	2014-08-11	Clouded Sulphur	2.125
Harrier Marsh	2014-08-02	Clouded Sulphur	3.75
Harrier Marsh	2014-08-02	Clouded Sulphur	3.75
Harrier Marsh	2014-08-05	Clouded Sulphur	3.75
Harrier Marsh	2014-08-18	Clouded Sulphur	3.75
Harrier Marsh	2014-08-18	Clouded Sulphur	3.75
Marietta Sand Prairie	2014-08-02	Clouded Sulphur	3.75
Marietta Sand Prairie	2014-08-02	Clouded Sulphur	3.75
Marietta Sand Prairie	2014-08-03	Clouded Sulphur	3.75
Marietta Sand Prairie	2014-08-03	Clouded Sulphur	3.75
Marietta Sand Prairie	2014-08-17	Clouded Sulphur	3.75
McCoy WMA	2014-07-30	Clouded Sulphur	3.75
McCoy WMA	2014-07-30	Clouded Sulphur	3.75
McCoy WMA	2014-08-02	Clouded Sulphur	3.75
McCoy WMA	2014-08-04	Clouded Sulphur	3.75
McCoy WMA	2014-08-04	Clouded Sulphur	3.75
McCoy WMA	2014-08-11	Clouded Sulphur	3.75
McCoy WMA	2014-08-13	Clouded Sulphur	3.75
McCoy WMA	2014-08-13	Clouded Sulphur	3.75
McCoy WMA	2014-08-13	Clouded Sulphur	3.75
McCoy WMA	2014-08-19	Clouded Sulphur	3.75
McCoy WMA	2014-08-19	Clouded Sulphur	3.75
McCoy WMA	2014-08-19	Clouded Sulphur	3.75
McCoy WMA	2014-08-21	Clouded Sulphur	3.75
Harrier Marsh	2014-08-02	Clouded Sulphur	7.5
Harrier Marsh	2014-08-05	Clouded Sulphur	7.5
Harrier Marsh	2014-08-05	Clouded Sulphur	7.5
Harrier Marsh	2014-08-18	Clouded Sulphur	7.5
Marietta Sand Prairie	2014-08-02	Clouded Sulphur	7.5
Marietta Sand Prairie	2014-08-03	Clouded Sulphur	7.5
McCoy WMA	2014-07-29	Clouded Sulphur	7.5
McCoy WMA	2014-07-29	Clouded Sulphur	7.5
McCoy WMA	2014-07-29	Clouded Sulphur	7.5
McCoy WMA	2014-07-30	Clouded Sulphur	7.5
McCoy WMA	2014-07-30	Clouded Sulphur	7.5
McCoy WMA	2014-08-02	Clouded Sulphur	7.5
McCoy WMA	2014-08-04	Clouded Sulphur	7.5
McCoy WMA	2014-08-04	Clouded Sulphur	7.5
McCoy WMA	2014-08-11	Clouded Sulphur	7.5
Harrier Marsh	2014-08-11	Clouded Sulphur	7.5
Harrier Marsh	2014-07-29	Clouded Sulphur	17.5
Harrier Marsh	2014-08-02	Clouded Sulphur	17.5
Harrier Marsh	2014-08-05	Clouded Sulphur	17.5
Marietta Sand Prairie	2014-08-02	Clouded Sulphur	17.5
McCoy WMA	2014-07-29	Clouded Sulphur	17.5
McCoy WMA	2014-07-30	Clouded Sulphur	17.5
McCoy WMA	2014-07-30	Clouded Sulphur	17.5
McCoy WMA	2014-07-30	Clouded Sulphur	17.5
McCoy WMA	2014-08-02	Clouded Sulphur	17.5
McCoy WMA	2014-08-02	Clouded Sulphur	17.5
McCoy WMA	2014-08-04	Clouded Sulphur	17.5
McCoy WMA	2014-08-04	Clouded Sulphur	17.5
McCoy WMA	2014-08-04	Clouded Sulphur	17.5
McCoy WMA	2014-08-11	Clouded Sulphur	17.5
McCoy WMA	2014-08-11	Clouded Sulphur	17.5
McCoy WMA	2014-08-19	Clouded Sulphur	17.5
McCoy WMA	2014-08-21	Clouded Sulphur	17.5
Harrier Marsh	2014-08-11	Clouded Sulphur	17.5
Marietta Sand Prairie	2014-08-03	Clouded Sulphur	37.5
Marietta Sand Prairie	2014-08-03	Clouded Sulphur	37.5
Marietta Sand Prairie	2014-08-05	Clouded Sulphur	37.5
Marietta Sand Prairie	2014-08-05	Clouded Sulphur	37.5
Marietta Sand Prairie	2014-08-16	Clouded Sulphur	37.5
Marietta Sand Prairie	2014-08-22	Clouded Sulphur	37.5
McCoy WMA	2014-07-29	Clouded Sulphur	37.5
McCoy WMA	2014-07-30	Clouded Sulphur	37.5
McCoy WMA	2014-08-02	Clouded Sulphur	37.5
McCoy WMA	2014-08-02	Clouded Sulphur	37.5
McCoy WMA	2014-08-04	Clouded Sulphur	37.5
McCoy WMA	2014-08-04	Clouded Sulphur	37.5
McCoy WMA	2014-08-04	Clouded Sulphur	37.5
McCoy WMA	2014-08-11	Clouded Sulphur	37.5
McCoy WMA	2014-08-11	Clouded Sulphur	37.5
McCoy WMA	2014-08-13	Clouded Sulphur	37.5
McCoy WMA	2014-08-13	Clouded Sulphur	37.5
McCoy WMA	2014-08-21	Clouded Sulphur	37.5
Harrier Marsh	2014-08-11	Clouded Sulphur	37.5
Marietta Sand Prairie	2014-08-14	Clouded Sulphur	75
McCoy WMA	2014-07-29	Clouded Sulphur	75
McCoy WMA	2014-08-04	Clouded Sulphur	75
McCoy WMA	2014-08-04	Clouded Sulphur	75
McCoy WMA	2014-08-04	Clouded Sulphur	75
McCoy WMA	2014-08-04	Clouded Sulphur	75
McCoy WMA	2014-08-11	Clouded Sulphur	75
McCoy WMA	2014-08-13	Clouded Sulphur	75
McCoy WMA	2014-08-13	Clouded Sulphur	75
McCoy WMA	2014-08-13	Clouded Sulphur	75
McCoy WMA	2014-08-13	Clouded Sulphur	75
McCoy WMA	2014-08-02	Common Buckeye	2.125
McCoy WMA	2014-08-21	Common Buckeye	3.75
Marietta Sand Prairie	2014-08-14	Common Buckeye	7.5
McCoy WMA	2014-08-21	Common Buckeye	17.5
McCoy WMA	2014-08-21	Common Checkered-Skipper	0.5
McCoy WMA	2014-08-21	Common Checkered-Skipper	0.5
McCoy WMA	2014-08-21	Common Checkered-Skipper	0.5
McCoy WMA	2014-08-13	Common Checkered-Skipper	1.375
McCoy WMA	2014-08-13	Common Checkered-Skipper	1.375
McCoy WMA	2014-08-19	Common Checkered-Skipper	1.375
McCoy WMA	2014-08-21	Common Checkered-Skipper	1.375
McCoy WMA	2014-08-13	Common Checkered-Skipper	2.125
McCoy WMA	2014-08-19	Common Checkered-Skipper	2.125
McCoy WMA	2014-08-21	Common Checkered-Skipper	2.125
McCoy WMA	2014-08-13	Common Checkered-Skipper	3.75
Marietta Sand Prairie	2014-08-05	Eastern Comma	0.5
Rock Creek Marsh	2014-07-30	Eastern Comma	0.5
Marietta Sand Prairie	2014-07-24	Eastern Comma	1.375
Marietta Sand Prairie	2014-08-03	Eastern Comma	1.375
Marietta Sand Prairie	2014-08-05	Eastern Comma	1.375
Rock Creek Marsh	2014-07-30	Eastern Comma	1.375
Rock Creek Marsh	2014-08-10	Eastern Comma	1.375
Rock Creek Marsh	2014-08-10	Eastern Comma	1.375
Marietta Sand Prairie	2014-08-05	Eastern Comma	2.125
Marietta Sand Prairie	2014-08-05	Eastern Comma	2.125
Rock Creek Marsh	2014-08-04	Eastern Comma	2.125
Rock Creek Marsh	2014-08-10	Eastern Comma	2.125
Marietta Sand Prairie	2014-08-14	Eastern Comma	3.75
Marietta Sand Prairie	2014-08-14	Eastern Comma	3.75
Marietta Sand Prairie	2014-08-17	Eastern Comma	7.5
Harrier Marsh	2014-07-29	Eastern Tailed-Blue	0.5
Harrier Marsh	2014-07-29	Eastern Tailed-Blue	0.5
Harrier Marsh	2014-07-30	Eastern Tailed-Blue	0.5
Harrier Marsh	2014-07-30	Eastern Tailed-Blue	0.5
Harrier Marsh	2014-08-02	Eastern Tailed-Blue	0.5
Harrier Marsh	2014-08-02	Eastern Tailed-Blue	0.5
Harrier Marsh	2014-08-02	Eastern Tailed-Blue	0.5
Harrier Marsh	2014-08-05	Eastern Tailed-Blue	0.5
Harrier Marsh	2014-08-05	Eastern Tailed-Blue	0.5
Harrier Marsh	2014-08-05	Eastern Tailed-Blue	0.5
Harrier Marsh	2014-08-05	Eastern Tailed-Blue	0.5
Harrier Marsh	2014-08-05	Eastern Tailed-Blue	0.5
Harrier Marsh	2014-08-18	Eastern Tailed-Blue	0.5
Marietta Sand Prairie	2014-07-24	Eastern Tailed-Blue	0.5
Marietta Sand Prairie	2014-08-02	Eastern Tailed-Blue	0.5
Marietta Sand Prairie	2014-08-02	Eastern Tailed-Blue	0.5
Marietta Sand Prairie	2014-08-03	Eastern Tailed-Blue	0.5
Marietta Sand Prairie	2014-08-03	Eastern Tailed-Blue	0.5
Marietta Sand Prairie	2014-08-03	Eastern Tailed-Blue	0.5
Marietta Sand Prairie	2014-08-05	Eastern Tailed-Blue	0.5
Marietta Sand Prairie	2014-08-14	Eastern Tailed-Blue	0.5
Marietta Sand Prairie	2014-08-14	Eastern Tailed-Blue	0.5
Marietta Sand Prairie	2014-08-14	Eastern Tailed-Blue	0.5
Marietta Sand Prairie	2014-08-14	Eastern Tailed-Blue	0.5
Marietta Sand Prairie	2014-08-16	Eastern Tailed-Blue	0.5
Marietta Sand Prairie	2014-08-16	Eastern Tailed-Blue	0.5
Marietta Sand Prairie	2014-08-16	Eastern Tailed-Blue	0.5
Marietta Sand Prairie	2014-08-16	Eastern Tailed-Blue	0.5
Marietta Sand Prairie	2014-08-16	Eastern Tailed-Blue	0.5
Marietta Sand Prairie	2014-08-17	Eastern Tailed-Blue	0.5
Marietta Sand Prairie	2014-08-17	Eastern Tailed-Blue	0.5
Marietta Sand Prairie	2014-08-17	Eastern Tailed-Blue	0.5
Marietta Sand Prairie	2014-08-17	Eastern Tailed-Blue	0.5
Marietta Sand Prairie	2014-08-17	Eastern Tailed-Blue	0.5
Marietta Sand Prairie	2014-08-17	Eastern Tailed-Blue	0.5
Marietta Sand Prairie	2014-08-17	Eastern Tailed-Blue	0.5
Marietta Sand Prairie	2014-08-17	Eastern Tailed-Blue	0.5
Marietta Sand Prairie	2014-08-17	Eastern Tailed-Blue	0.5
Marietta Sand Prairie	2014-08-17	Eastern Tailed-Blue	0.5
Marietta Sand Prairie	2014-08-17	Eastern Tailed-Blue	0.5
Marietta Sand Prairie	2014-08-17	Eastern Tailed-Blue	0.5
Marietta Sand Prairie	2014-08-17	Eastern Tailed-Blue	0.5
Marietta Sand Prairie	2014-08-17	Eastern Tailed-Blue	0.5
Marietta Sand Prairie	2014-08-17	Eastern Tailed-Blue	0.5
Marietta Sand Prairie	2014-08-17	Eastern Tailed-Blue	0.5
Marietta Sand Prairie	2014-08-17	Eastern Tailed-Blue	0.5
Marietta Sand Prairie	2014-08-17	Eastern Tailed-Blue	0.5
Marietta Sand Prairie	2014-08-17	Eastern Tailed-Blue	0.5
Marietta Sand Prairie	2014-08-22	Eastern Tailed-Blue	0.5
Marietta Sand Prairie	2014-08-22	Eastern Tailed-Blue	0.5
Marietta Sand Prairie	2014-08-22	Eastern Tailed-Blue	0.5
McCoy WMA	2014-07-30	Eastern Tailed-Blue	0.5
McCoy WMA	2014-07-30	Eastern Tailed-Blue	0.5
McCoy WMA	2014-07-30	Eastern Tailed-Blue	0.5
McCoy WMA	2014-07-30	Eastern Tailed-Blue	0.5
McCoy WMA	2014-08-02	Eastern Tailed-Blue	0.5
McCoy WMA	2014-08-04	Eastern Tailed-Blue	0.5
McCoy WMA	2014-08-04	Eastern Tailed-Blue	0.5
McCoy WMA	2014-08-04	Eastern Tailed-Blue	0.5
McCoy WMA	2014-08-11	Eastern Tailed-Blue	0.5
McCoy WMA	2014-08-11	Eastern Tailed-Blue	0.5
McCoy WMA	2014-08-13	Eastern Tailed-Blue	0.5
McCoy WMA	2014-08-13	Eastern Tailed-Blue	0.5
McCoy WMA	2014-08-13	Eastern Tailed-Blue	0.5
McCoy WMA	2014-08-13	Eastern Tailed-Blue	0.5
McCoy WMA	2014-08-19	Eastern Tailed-Blue	0.5
McCoy WMA	2014-08-21	Eastern Tailed-Blue	0.5
McCoy WMA	2014-08-21	Eastern Tailed-Blue	0.5
Harrier Marsh	2014-08-11	Eastern Tailed-Blue	0.5
Harrier Marsh	2014-07-29	Eastern Tailed-Blue	1.375
Harrier Marsh	2014-07-30	Eastern Tailed-Blue	1.375
Harrier Marsh	2014-07-30	Eastern Tailed-Blue	1.375
Harrier Marsh	2014-07-30	Eastern Tailed-Blue	1.375
Harrier Marsh	2014-08-02	Eastern Tailed-Blue	1.375
Harrier Marsh	2014-08-02	Eastern Tailed-Blue	1.375
Harrier Marsh	2014-08-05	Eastern Tailed-Blue	1.375
Harrier Marsh	2014-08-05	Eastern Tailed-Blue	1.375
Harrier Marsh	2014-08-05	Eastern Tailed-Blue	1.375
Harrier Marsh	2014-08-05	Eastern Tailed-Blue	1.375
Harrier Marsh	2014-08-05	Eastern Tailed-Blue	1.375
Harrier Marsh	2014-08-18	Eastern Tailed-Blue	1.375
Harrier Marsh	2014-08-21	Eastern Tailed-Blue	1.375
Marietta Sand Prairie	2014-08-02	Eastern Tailed-Blue	1.375
Marietta Sand Prairie	2014-08-03	Eastern Tailed-Blue	1.375
Marietta Sand Prairie	2014-08-03	Eastern Tailed-Blue	1.375
Marietta Sand Prairie	2014-08-03	Eastern Tailed-Blue	1.375
Marietta Sand Prairie	2014-08-05	Eastern Tailed-Blue	1.375
Marietta Sand Prairie	2014-08-14	Eastern Tailed-Blue	1.375
Marietta Sand Prairie	2014-08-14	Eastern Tailed-Blue	1.375
Marietta Sand Prairie	2014-08-14	Eastern Tailed-Blue	1.375
Marietta Sand Prairie	2014-08-14	Eastern Tailed-Blue	1.375
Marietta Sand Prairie	2014-08-14	Eastern Tailed-Blue	1.375
Marietta Sand Prairie	2014-08-14	Eastern Tailed-Blue	1.375
Marietta Sand Prairie	2014-08-16	Eastern Tailed-Blue	1.375
Marietta Sand Prairie	2014-08-16	Eastern Tailed-Blue	1.375
Marietta Sand Prairie	2014-08-17	Eastern Tailed-Blue	1.375
Marietta Sand Prairie	2014-08-17	Eastern Tailed-Blue	1.375
Marietta Sand Prairie	2014-08-17	Eastern Tailed-Blue	1.375
Marietta Sand Prairie	2014-08-17	Eastern Tailed-Blue	1.375
Marietta Sand Prairie	2014-08-17	Eastern Tailed-Blue	1.375
Marietta Sand Prairie	2014-08-17	Eastern Tailed-Blue	1.375
Marietta Sand Prairie	2014-08-17	Eastern Tailed-Blue	1.375
Marietta Sand Prairie	2014-08-17	Eastern Tailed-Blue	1.375
Marietta Sand Prairie	2014-08-17	Eastern Tailed-Blue	1.375
Marietta Sand Prairie	2014-08-17	Eastern Tailed-Blue	1.375
Marietta Sand Prairie	2014-08-22	Eastern Tailed-Blue	1.375
Marietta Sand Prairie	2014-08-22	Eastern Tailed-Blue	1.375
Marietta Sand Prairie	2014-08-22	Eastern Tailed-Blue	1.375
Marietta Sand Prairie	2014-08-22	Eastern Tailed-Blue	1.375
Marietta Sand Prairie	2014-08-22	Eastern Tailed-Blue	1.375
McCoy WMA	2014-07-29	Eastern Tailed-Blue	1.375
McCoy WMA	2014-07-29	Eastern Tailed-Blue	1.375
McCoy WMA	2014-07-29	Eastern Tailed-Blue	1.375
McCoy WMA	2014-07-30	Eastern Tailed-Blue	1.375
McCoy WMA	2014-07-30	Eastern Tailed-Blue	1.375
McCoy WMA	2014-07-30	Eastern Tailed-Blue	1.375
McCoy WMA	2014-08-02	Eastern Tailed-Blue	1.375
McCoy WMA	2014-08-04	Eastern Tailed-Blue	1.375
McCoy WMA	2014-08-04	Eastern Tailed-Blue	1.375
McCoy WMA	2014-08-04	Eastern Tailed-Blue	1.375
McCoy WMA	2014-08-04	Eastern Tailed-Blue	1.375
McCoy WMA	2014-08-11	Eastern Tailed-Blue	1.375
McCoy WMA	2014-08-11	Eastern Tailed-Blue	1.375
McCoy WMA	2014-08-13	Eastern Tailed-Blue	1.375
McCoy WMA	2014-08-19	Eastern Tailed-Blue	1.375
McCoy WMA	2014-08-19	Eastern Tailed-Blue	1.375
McCoy WMA	2014-08-21	Eastern Tailed-Blue	1.375
McCoy WMA	2014-08-21	Eastern Tailed-Blue	1.375
Harrier Marsh	2014-08-11	Eastern Tailed-Blue	1.375
Harrier Marsh	2014-08-11	Eastern Tailed-Blue	1.375
Harrier Marsh	2014-07-29	Eastern Tailed-Blue	2.125
Harrier Marsh	2014-07-29	Eastern Tailed-Blue	2.125
Harrier Marsh	2014-07-30	Eastern Tailed-Blue	2.125
Harrier Marsh	2014-08-05	Eastern Tailed-Blue	2.125
Harrier Marsh	2014-08-05	Eastern Tailed-Blue	2.125
Harrier Marsh	2014-08-18	Eastern Tailed-Blue	2.125
Harrier Marsh	2014-08-18	Eastern Tailed-Blue	2.125
Harrier Marsh	2014-08-21	Eastern Tailed-Blue	2.125
Marietta Sand Prairie	2014-08-03	Eastern Tailed-Blue	2.125
Marietta Sand Prairie	2014-08-05	Eastern Tailed-Blue	2.125
Marietta Sand Prairie	2014-08-05	Eastern Tailed-Blue	2.125
Marietta Sand Prairie	2014-08-14	Eastern Tailed-Blue	2.125
Marietta Sand Prairie	2014-08-14	Eastern Tailed-Blue	2.125
Marietta Sand Prairie	2014-08-14	Eastern Tailed-Blue	2.125
Marietta Sand Prairie	2014-08-14	Eastern Tailed-Blue	2.125
Marietta Sand Prairie	2014-08-14	Eastern Tailed-Blue	2.125
Marietta Sand Prairie	2014-08-14	Eastern Tailed-Blue	2.125
Marietta Sand Prairie	2014-08-16	Eastern Tailed-Blue	2.125
Marietta Sand Prairie	2014-08-16	Eastern Tailed-Blue	2.125
Marietta Sand Prairie	2014-08-16	Eastern Tailed-Blue	2.125
Marietta Sand Prairie	2014-08-16	Eastern Tailed-Blue	2.125
Marietta Sand Prairie	2014-08-17	Eastern Tailed-Blue	2.125
Marietta Sand Prairie	2014-08-17	Eastern Tailed-Blue	2.125
Marietta Sand Prairie	2014-08-17	Eastern Tailed-Blue	2.125
Marietta Sand Prairie	2014-08-17	Eastern Tailed-Blue	2.125
Marietta Sand Prairie	2014-08-17	Eastern Tailed-Blue	2.125
Marietta Sand Prairie	2014-08-17	Eastern Tailed-Blue	2.125
Marietta Sand Prairie	2014-08-17	Eastern Tailed-Blue	2.125
Marietta Sand Prairie	2014-08-17	Eastern Tailed-Blue	2.125
Marietta Sand Prairie	2014-08-22	Eastern Tailed-Blue	2.125
Marietta Sand Prairie	2014-08-22	Eastern Tailed-Blue	2.125
Marietta Sand Prairie	2014-08-22	Eastern Tailed-Blue	2.125
Marietta Sand Prairie	2014-08-22	Eastern Tailed-Blue	2.125
Marietta Sand Prairie	2014-08-22	Eastern Tailed-Blue	2.125
Marietta Sand Prairie	2014-08-22	Eastern Tailed-Blue	2.125
Marietta Sand Prairie	2014-08-22	Eastern Tailed-Blue	2.125
McCoy WMA	2014-07-30	Eastern Tailed-Blue	2.125
McCoy WMA	2014-07-30	Eastern Tailed-Blue	2.125
McCoy WMA	2014-08-04	Eastern Tailed-Blue	2.125
McCoy WMA	2014-08-04	Eastern Tailed-Blue	2.125
McCoy WMA	2014-08-11	Eastern Tailed-Blue	2.125
McCoy WMA	2014-08-11	Eastern Tailed-Blue	2.125
McCoy WMA	2014-08-13	Eastern Tailed-Blue	2.125
McCoy WMA	2014-08-13	Eastern Tailed-Blue	2.125
McCoy WMA	2014-08-19	Eastern Tailed-Blue	2.125
McCoy WMA	2014-08-21	Eastern Tailed-Blue	2.125
Harrier Marsh	2014-08-11	Eastern Tailed-Blue	2.125
Marietta Sand Prairie	2014-08-03	Eastern Tailed-Blue	3.75
Marietta Sand Prairie	2014-08-05	Eastern Tailed-Blue	3.75
Marietta Sand Prairie	2014-08-05	Eastern Tailed-Blue	3.75
Marietta Sand Prairie	2014-08-14	Eastern Tailed-Blue	3.75
Marietta Sand Prairie	2014-08-14	Eastern Tailed-Blue	3.75
Marietta Sand Prairie	2014-08-14	Eastern Tailed-Blue	3.75
Marietta Sand Prairie	2014-08-14	Eastern Tailed-Blue	3.75
Marietta Sand Prairie	2014-08-14	Eastern Tailed-Blue	3.75
Marietta Sand Prairie	2014-08-14	Eastern Tailed-Blue	3.75
Marietta Sand Prairie	2014-08-14	Eastern Tailed-Blue	3.75
Marietta Sand Prairie	2014-08-14	Eastern Tailed-Blue	3.75
Marietta Sand Prairie	2014-08-14	Eastern Tailed-Blue	3.75
Marietta Sand Prairie	2014-08-16	Eastern Tailed-Blue	3.75
Marietta Sand Prairie	2014-08-16	Eastern Tailed-Blue	3.75
Marietta Sand Prairie	2014-08-16	Eastern Tailed-Blue	3.75
Marietta Sand Prairie	2014-08-16	Eastern Tailed-Blue	3.75
Marietta Sand Prairie	2014-08-17	Eastern Tailed-Blue	3.75
Marietta Sand Prairie	2014-08-17	Eastern Tailed-Blue	3.75
Marietta Sand Prairie	2014-08-17	Eastern Tailed-Blue	3.75
Marietta Sand Prairie	2014-08-17	Eastern Tailed-Blue	3.75
Marietta Sand Prairie	2014-08-17	Eastern Tailed-Blue	3.75
Marietta Sand Prairie	2014-08-17	Eastern Tailed-Blue	3.75
Marietta Sand Prairie	2014-08-17	Eastern Tailed-Blue	3.75
Marietta Sand Prairie	2014-08-17	Eastern Tailed-Blue	3.75
Marietta Sand Prairie	2014-08-22	Eastern Tailed-Blue	3.75
Marietta Sand Prairie	2014-08-22	Eastern Tailed-Blue	3.75
Marietta Sand Prairie	2014-08-22	Eastern Tailed-Blue	3.75
Marietta Sand Prairie	2014-08-22	Eastern Tailed-Blue	3.75
McCoy WMA	2014-07-29	Eastern Tailed-Blue	3.75
McCoy WMA	2014-07-30	Eastern Tailed-Blue	3.75
McCoy WMA	2014-08-04	Eastern Tailed-Blue	3.75
McCoy WMA	2014-08-04	Eastern Tailed-Blue	3.75
McCoy WMA	2014-08-11	Eastern Tailed-Blue	3.75
McCoy WMA	2014-08-19	Eastern Tailed-Blue	3.75
Harrier Marsh	2014-07-30	Eastern Tailed-Blue	7.5
Marietta Sand Prairie	2014-08-14	Eastern Tailed-Blue	7.5
Marietta Sand Prairie	2014-08-14	Eastern Tailed-Blue	7.5
Marietta Sand Prairie	2014-08-14	Eastern Tailed-Blue	7.5
Marietta Sand Prairie	2014-08-16	Eastern Tailed-Blue	7.5
Marietta Sand Prairie	2014-08-16	Eastern Tailed-Blue	7.5
Marietta Sand Prairie	2014-08-16	Eastern Tailed-Blue	7.5
Marietta Sand Prairie	2014-08-16	Eastern Tailed-Blue	7.5
Marietta Sand Prairie	2014-08-16	Eastern Tailed-Blue	7.5
Marietta Sand Prairie	2014-08-16	Eastern Tailed-Blue	7.5
Marietta Sand Prairie	2014-08-17	Eastern Tailed-Blue	7.5
Marietta Sand Prairie	2014-08-17	Eastern Tailed-Blue	7.5
Marietta Sand Prairie	2014-08-17	Eastern Tailed-Blue	7.5
Marietta Sand Prairie	2014-08-17	Eastern Tailed-Blue	7.5
Marietta Sand Prairie	2014-08-17	Eastern Tailed-Blue	7.5
Marietta Sand Prairie	2014-08-17	Eastern Tailed-Blue	7.5
Marietta Sand Prairie	2014-08-22	Eastern Tailed-Blue	7.5
McCoy WMA	2014-07-30	Eastern Tailed-Blue	7.5
McCoy WMA	2014-07-30	Eastern Tailed-Blue	7.5
McCoy WMA	2014-08-02	Eastern Tailed-Blue	7.5
McCoy WMA	2014-08-04	Eastern Tailed-Blue	7.5
McCoy WMA	2014-08-11	Eastern Tailed-Blue	7.5
McCoy WMA	2014-08-13	Eastern Tailed-Blue	7.5
McCoy WMA	2014-08-13	Eastern Tailed-Blue	7.5
Harrier Marsh	2014-08-18	Eastern Tailed-Blue	17.5
Marietta Sand Prairie	2014-08-03	Eastern Tailed-Blue	17.5
Marietta Sand Prairie	2014-08-16	Eastern Tailed-Blue	17.5
Marietta Sand Prairie	2014-08-16	Eastern Tailed-Blue	17.5
Marietta Sand Prairie	2014-08-16	Eastern Tailed-Blue	17.5
Marietta Sand Prairie	2014-08-16	Eastern Tailed-Blue	17.5
Marietta Sand Prairie	2014-08-17	Eastern Tailed-Blue	17.5
Marietta Sand Prairie	2014-08-22	Eastern Tailed-Blue	17.5
Marietta Sand Prairie	2014-08-22	Eastern Tailed-Blue	17.5
Marietta Sand Prairie	2014-08-22	Eastern Tailed-Blue	17.5
McCoy WMA	2014-08-13	Eastern Tailed-Blue	17.5
McCoy WMA	2014-08-21	Eastern Tailed-Blue	17.5
McCoy WMA	2014-08-04	Eastern Tiger Swallowtail	0.5
McCoy WMA	2014-08-13	Eastern Tiger Swallowtail	0.5
McCoy WMA	2014-08-19	Eastern Tiger Swallowtail	0.5
Rock Creek Marsh	2014-08-17	Eastern Tiger Swallowtail	1.375
Marietta Sand Prairie	2014-08-03	Eastern Tiger Swallowtail	2.125
McCoy WMA	2014-08-02	Eastern Tiger Swallowtail	2.125
McCoy WMA	2014-08-04	Eastern Tiger Swallowtail	2.125
Rock Creek Marsh	2014-08-04	Eastern Tiger Swallowtail	2.125
McCoy WMA	2014-07-29	Eastern Tiger Swallowtail	3.75
McCoy WMA	2014-08-02	Eastern Tiger Swallowtail	3.75
McCoy WMA	2014-08-04	Eastern Tiger Swallowtail	3.75
Rock Creek Marsh	2014-08-04	Eastern Tiger Swallowtail	3.75
McCoy WMA	2014-07-29	Eastern Tiger Swallowtail	7.5
Rock Creek Marsh	2014-08-03	Eastern Tiger Swallowtail	7.5
Marietta Sand Prairie	2014-08-14	Eastern Tiger Swallowtail	17.5
McCoy WMA	2014-07-29	Eastern Tiger Swallowtail	17.5
McCoy WMA	2014-07-29	Eastern Tiger Swallowtail	17.5
McCoy WMA	2014-07-29	Eastern Tiger Swallowtail	17.5
McCoy WMA	2014-08-02	Eastern Tiger Swallowtail	17.5
McCoy WMA	2014-08-11	Eastern Tiger Swallowtail	17.5
McCoy WMA	2014-08-21	Eastern Tiger Swallowtail	17.5
Rock Creek Marsh	2014-08-04	Eastern Tiger Swallowtail	17.5
Rock Creek Marsh	2014-08-10	Eastern Tiger Swallowtail	17.5
Marietta Sand Prairie	2014-08-17	Eastern Tiger Swallowtail	37.5
McCoy WMA	2014-07-29	Eastern Tiger Swallowtail	37.5
McCoy WMA	2014-08-02	Eastern Tiger Swallowtail	37.5
McCoy WMA	2014-08-13	Eastern Tiger Swallowtail	37.5
McCoy WMA	2014-08-19	Eastern Tiger Swallowtail	37.5
McCoy WMA	2014-08-19	Eastern Tiger Swallowtail	37.5
Rock Creek Marsh	2014-08-10	Eastern Tiger Swallowtail	37.5
Marietta Sand Prairie	2014-08-16	Eastern Tiger Swallowtail	75
McCoy WMA	2014-08-02	Eastern Tiger Swallowtail	75
McCoy WMA	2014-08-02	Eastern Tiger Swallowtail	75
McCoy WMA	2014-08-04	Eastern Tiger Swallowtail	75
McCoy WMA	2014-08-13	Eastern Tiger Swallowtail	75
McCoy WMA	2014-08-19	Eastern Tiger Swallowtail	75
McCoy WMA	2014-08-21	Eastern Tiger Swallowtail	75
McCoy WMA	2014-08-21	Eastern Tiger Swallowtail	75
Rock Creek Marsh	2014-07-30	Eastern Tiger Swallowtail	75
Rock Creek Marsh	2014-08-03	Eastern Tiger Swallowtail	75
McCoy WMA	2014-08-02	Giant Swallowtail	1.375
McCoy WMA	2014-08-11	Giant Swallowtail	1.375
McCoy WMA	2014-08-13	Giant Swallowtail	1.375
McCoy WMA	2014-08-19	Giant Swallowtail	3.75
McCoy WMA	2014-07-29	Giant Swallowtail	7.5
McCoy WMA	2014-07-30	Giant Swallowtail	7.5
McCoy WMA	2014-08-02	Giant Swallowtail	7.5
McCoy WMA	2014-08-19	Giant Swallowtail	7.5
McCoy WMA	2014-08-21	Giant Swallowtail	37.5
McCoy WMA	2014-08-21	Giant Swallowtail	37.5
McCoy WMA	2014-08-11	Giant Swallowtail	75
Marietta Sand Prairie	2014-08-02	Gorgone Checkerspot	0.5
McCoy WMA	2014-07-29	Great Spangled Fritillary	1.375
Marietta Sand Prairie	2014-08-03	Great Spangled Fritillary	2.125
McCoy WMA	2014-07-30	Great Spangled Fritillary	2.125
McCoy WMA	2014-08-13	Great Spangled Fritillary	2.125
McCoy WMA	2014-07-29	Great Spangled Fritillary	3.75
McCoy WMA	2014-07-29	Great Spangled Fritillary	7.5
McCoy WMA	2014-07-29	Great Spangled Fritillary	7.5
McCoy WMA	2014-07-30	Great Spangled Fritillary	7.5
Marietta Sand Prairie	2014-08-16	Great Spangled Fritillary	17.5
McCoy WMA	2014-08-02	Great Spangled Fritillary	17.5
McCoy WMA	2014-08-02	Great Spangled Fritillary	37.5
McCoy WMA	2014-08-02	Great Spangled Fritillary	75
Marietta Sand Prairie	2014-07-24	Least Skipper	0.5
Marietta Sand Prairie	2014-08-03	Least Skipper	0.5
Marietta Sand Prairie	2014-08-03	Least Skipper	0.5
Marietta Sand Prairie	2014-08-03	Least Skipper	0.5
Marietta Sand Prairie	2014-08-03	Least Skipper	0.5
Marietta Sand Prairie	2014-08-05	Least Skipper	0.5
Marietta Sand Prairie	2014-08-17	Least Skipper	0.5
Marietta Sand Prairie	2014-08-17	Least Skipper	0.5
Marietta Sand Prairie	2014-08-17	Least Skipper	0.5
Marietta Sand Prairie	2014-08-17	Least Skipper	0.5
Marietta Sand Prairie	2014-08-17	Least Skipper	0.5
Marietta Sand Prairie	2014-08-22	Least Skipper	0.5
McCoy WMA	2014-07-29	Least Skipper	0.5
McCoy WMA	2014-08-02	Least Skipper	0.5
McCoy WMA	2014-08-02	Least Skipper	0.5
McCoy WMA	2014-08-02	Least Skipper	0.5
McCoy WMA	2014-08-13	Least Skipper	0.5
McCoy WMA	2014-08-19	Least Skipper	0.5
Rock Creek Marsh	2014-07-30	Least Skipper	0.5
Rock Creek Marsh	2014-07-30	Least Skipper	0.5
Rock Creek Marsh	2014-07-30	Least Skipper	0.5
Rock Creek Marsh	2014-07-30	Least Skipper	0.5
Rock Creek Marsh	2014-07-30	Least Skipper	0.5
Rock Creek Marsh	2014-07-30	Least Skipper	0.5
Rock Creek Marsh	2014-07-30	Least Skipper	0.5
Rock Creek Marsh	2014-07-30	Least Skipper	0.5
Rock Creek Marsh	2014-07-30	Least Skipper	0.5
Rock Creek Marsh	2014-07-30	Least Skipper	0.5
Rock Creek Marsh	2014-07-30	Least Skipper	0.5
Rock Creek Marsh	2014-08-03	Least Skipper	0.5
Rock Creek Marsh	2014-08-03	Least Skipper	0.5
Rock Creek Marsh	2014-08-03	Least Skipper	0.5
Rock Creek Marsh	2014-08-03	Least Skipper	0.5
Rock Creek Marsh	2014-08-03	Least Skipper	0.5
Rock Creek Marsh	2014-08-03	Least Skipper	0.5
Rock Creek Marsh	2014-08-03	Least Skipper	0.5
Rock Creek Marsh	2014-08-03	Least Skipper	0.5
Rock Creek Marsh	2014-08-03	Least Skipper	0.5
Rock Creek Marsh	2014-08-04	Least Skipper	0.5
Rock Creek Marsh	2014-08-04	Least Skipper	0.5
Rock Creek Marsh	2014-08-04	Least Skipper	0.5
Rock Creek Marsh	2014-08-04	Least Skipper	0.5
Rock Creek Marsh	2014-08-04	Least Skipper	0.5
Rock Creek Marsh	2014-08-04	Least Skipper	0.5
Rock Creek Marsh	2014-08-04	Least Skipper	0.5
Rock Creek Marsh	2014-08-04	Least Skipper	0.5
Rock Creek Marsh	2014-08-10	Least Skipper	0.5
Rock Creek Marsh	2014-08-10	Least Skipper	0.5
Rock Creek Marsh	2014-08-10	Least Skipper	0.5
Rock Creek Marsh	2014-08-10	Least Skipper	0.5
Rock Creek Marsh	2014-08-10	Least Skipper	0.5
Rock Creek Marsh	2014-08-10	Least Skipper	0.5
Rock Creek Marsh	2014-08-17	Least Skipper	0.5
Rock Creek Marsh	2014-08-17	Least Skipper	0.5
Rock Creek Marsh	2014-08-17	Least Skipper	0.5
Rock Creek Marsh	2014-08-17	Least Skipper	0.5
Rock Creek Marsh	2014-08-17	Least Skipper	0.5
Rock Creek Marsh	2014-08-17	Least Skipper	0.5
Rock Creek Marsh	2014-08-17	Least Skipper	0.5
Rock Creek Marsh	2014-08-17	Least Skipper	0.5
Rock Creek Marsh	2014-08-17	Least Skipper	0.5
Rock Creek Marsh	2014-08-17	Least Skipper	0.5
Rock Creek Marsh	2014-08-17	Least Skipper	0.5
Rock Creek Marsh	2014-08-17	Least Skipper	0.5
Rock Creek Marsh	2014-08-17	Least Skipper	0.5
Rock Creek Marsh	2014-08-17	Least Skipper	0.5
Rock Creek Marsh	2014-08-17	Least Skipper	0.5
Rock Creek Marsh	2014-08-17	Least Skipper	0.5
Rock Creek Marsh	2014-08-17	Least Skipper	0.5
Rock Creek Marsh	2014-08-17	Least Skipper	0.5
Rock Creek Marsh	2014-08-17	Least Skipper	0.5
Rock Creek Marsh	2014-08-17	Least Skipper	0.5
Rock Creek Marsh	2014-08-17	Least Skipper	0.5
Rock Creek Marsh	2014-08-17	Least Skipper	0.5
Rock Creek Marsh	2014-08-17	Least Skipper	0.5
Rock Creek Marsh	2014-08-17	Least Skipper	0.5
Rock Creek Marsh	2014-08-17	Least Skipper	0.5
Rock Creek Marsh	2014-08-17	Least Skipper	0.5
Rock Creek Marsh	2014-08-17	Least Skipper	0.5
Rock Creek Marsh	2014-08-22	Least Skipper	0.5
Rock Creek Marsh	2014-08-22	Least Skipper	0.5
Rock Creek Marsh	2014-08-22	Least Skipper	0.5
Rock Creek Marsh	2014-08-22	Least Skipper	0.5
Rock Creek Marsh	2014-08-22	Least Skipper	0.5
Rock Creek Marsh	2014-08-22	Least Skipper	0.5
Rock Creek Marsh	2014-08-22	Least Skipper	0.5
Rock Creek Marsh	2014-08-22	Least Skipper	0.5
Rock Creek Marsh	2014-08-22	Least Skipper	0.5
Rock Creek Marsh	2014-08-22	Least Skipper	0.5
Rock Creek Marsh	2014-08-22	Least Skipper	0.5
Rock Creek Marsh	2014-08-23	Least Skipper	0.5
Rock Creek Marsh	2014-08-23	Least Skipper	0.5
Rock Creek Marsh	2014-08-23	Least Skipper	0.5
Rock Creek Marsh	2014-08-23	Least Skipper	0.5
Rock Creek Marsh	2014-08-23	Least Skipper	0.5
Rock Creek Marsh	2014-08-23	Least Skipper	0.5
Rock Creek Marsh	2014-08-23	Least Skipper	0.5
Rock Creek Marsh	2014-08-23	Least Skipper	0.5
Rock Creek Marsh	2014-08-23	Least Skipper	0.5
Rock Creek Marsh	2014-08-23	Least Skipper	0.5
Rock Creek Marsh	2014-08-23	Least Skipper	0.5
Rock Creek Marsh	2014-08-23	Least Skipper	0.5
Rock Creek Marsh	2014-08-23	Least Skipper	0.5
Rock Creek Marsh	2014-08-23	Least Skipper	0.5
Rock Creek Marsh	2014-08-23	Least Skipper	0.5
Rock Creek Marsh	2014-08-23	Least Skipper	0.5
Rock Creek Marsh	2014-08-23	Least Skipper	0.5
Rock Creek Marsh	2014-08-23	Least Skipper	0.5
Rock Creek Marsh	2014-08-23	Least Skipper	0.5
Rock Creek Marsh	2014-08-23	Least Skipper	0.5
Rock Creek Marsh	2014-08-23	Least Skipper	0.5
Rock Creek Marsh	2014-08-24	Least Skipper	0.5
Rock Creek Marsh	2014-08-24	Least Skipper	0.5
Rock Creek Marsh	2014-08-24	Least Skipper	0.5
Rock Creek Marsh	2014-08-24	Least Skipper	0.5
Rock Creek Marsh	2014-08-24	Least Skipper	0.5
Rock Creek Marsh	2014-08-24	Least Skipper	0.5
Rock Creek Marsh	2014-08-24	Least Skipper	0.5
Rock Creek Marsh	2014-08-24	Least Skipper	0.5
Rock Creek Marsh	2014-08-24	Least Skipper	0.5
Rock Creek Marsh	2014-08-24	Least Skipper	0.5
Rock Creek Marsh	2014-08-24	Least Skipper	0.5
Rock Creek Marsh	2014-08-24	Least Skipper	0.5
Rock Creek Marsh	2014-08-24	Least Skipper	0.5
Rock Creek Marsh	2014-08-24	Least Skipper	0.5
Marietta Sand Prairie	2014-07-24	Least Skipper	1.375
Marietta Sand Prairie	2014-07-24	Least Skipper	1.375
Marietta Sand Prairie	2014-08-02	Least Skipper	1.375
Marietta Sand Prairie	2014-08-03	Least Skipper	1.375
Marietta Sand Prairie	2014-08-05	Least Skipper	1.375
Marietta Sand Prairie	2014-08-16	Least Skipper	1.375
Marietta Sand Prairie	2014-08-17	Least Skipper	1.375
McCoy WMA	2014-07-29	Least Skipper	1.375
McCoy WMA	2014-08-02	Least Skipper	1.375
McCoy WMA	2014-08-02	Least Skipper	1.375
McCoy WMA	2014-08-04	Least Skipper	1.375
McCoy WMA	2014-08-11	Least Skipper	1.375
McCoy WMA	2014-08-13	Least Skipper	1.375
McCoy WMA	2014-08-19	Least Skipper	1.375
McCoy WMA	2014-08-19	Least Skipper	1.375
Rock Creek Marsh	2014-07-30	Least Skipper	1.375
Rock Creek Marsh	2014-07-30	Least Skipper	1.375
Rock Creek Marsh	2014-07-30	Least Skipper	1.375
Rock Creek Marsh	2014-07-30	Least Skipper	1.375
Rock Creek Marsh	2014-07-30	Least Skipper	1.375
Rock Creek Marsh	2014-08-03	Least Skipper	1.375
Rock Creek Marsh	2014-08-03	Least Skipper	1.375
Rock Creek Marsh	2014-08-03	Least Skipper	1.375
Rock Creek Marsh	2014-08-03	Least Skipper	1.375
Rock Creek Marsh	2014-08-03	Least Skipper	1.375
Rock Creek Marsh	2014-08-03	Least Skipper	1.375
Rock Creek Marsh	2014-08-03	Least Skipper	1.375
Rock Creek Marsh	2014-08-04	Least Skipper	1.375
Rock Creek Marsh	2014-08-04	Least Skipper	1.375
Rock Creek Marsh	2014-08-04	Least Skipper	1.375
Rock Creek Marsh	2014-08-04	Least Skipper	1.375
Rock Creek Marsh	2014-08-04	Least Skipper	1.375
Rock Creek Marsh	2014-08-04	Least Skipper	1.375
Rock Creek Marsh	2014-08-04	Least Skipper	1.375
Rock Creek Marsh	2014-08-04	Least Skipper	1.375
Rock Creek Marsh	2014-08-04	Least Skipper	1.375
Rock Creek Marsh	2014-08-10	Least Skipper	1.375
Rock Creek Marsh	2014-08-10	Least Skipper	1.375
Rock Creek Marsh	2014-08-10	Least Skipper	1.375
Rock Creek Marsh	2014-08-10	Least Skipper	1.375
Rock Creek Marsh	2014-08-10	Least Skipper	1.375
Rock Creek Marsh	2014-08-17	Least Skipper	1.375
Rock Creek Marsh	2014-08-17	Least Skipper	1.375
Rock Creek Marsh	2014-08-17	Least Skipper	1.375
Rock Creek Marsh	2014-08-17	Least Skipper	1.375
Rock Creek Marsh	2014-08-17	Least Skipper	1.375
Rock Creek Marsh	2014-08-17	Least Skipper	1.375
Rock Creek Marsh	2014-08-17	Least Skipper	1.375
Rock Creek Marsh	2014-08-17	Least Skipper	1.375
Rock Creek Marsh	2014-08-17	Least Skipper	1.375
Rock Creek Marsh	2014-08-17	Least Skipper	1.375
Rock Creek Marsh	2014-08-17	Least Skipper	1.375
Rock Creek Marsh	2014-08-17	Least Skipper	1.375
Rock Creek Marsh	2014-08-17	Least Skipper	1.375
Rock Creek Marsh	2014-08-17	Least Skipper	1.375
Rock Creek Marsh	2014-08-17	Least Skipper	1.375
Rock Creek Marsh	2014-08-17	Least Skipper	1.375
Rock Creek Marsh	2014-08-17	Least Skipper	1.375
Rock Creek Marsh	2014-08-17	Least Skipper	1.375
Rock Creek Marsh	2014-08-17	Least Skipper	1.375
Rock Creek Marsh	2014-08-17	Least Skipper	1.375
Rock Creek Marsh	2014-08-17	Least Skipper	1.375
Rock Creek Marsh	2014-08-17	Least Skipper	1.375
Rock Creek Marsh	2014-08-17	Least Skipper	1.375
Rock Creek Marsh	2014-08-22	Least Skipper	1.375
Rock Creek Marsh	2014-08-22	Least Skipper	1.375
Rock Creek Marsh	2014-08-22	Least Skipper	1.375
Rock Creek Marsh	2014-08-22	Least Skipper	1.375
Rock Creek Marsh	2014-08-22	Least Skipper	1.375
Rock Creek Marsh	2014-08-22	Least Skipper	1.375
Rock Creek Marsh	2014-08-22	Least Skipper	1.375
Rock Creek Marsh	2014-08-22	Least Skipper	1.375
Rock Creek Marsh	2014-08-22	Least Skipper	1.375
Rock Creek Marsh	2014-08-22	Least Skipper	1.375
Rock Creek Marsh	2014-08-22	Least Skipper	1.375
Rock Creek Marsh	2014-08-22	Least Skipper	1.375
Rock Creek Marsh	2014-08-22	Least Skipper	1.375
Rock Creek Marsh	2014-08-23	Least Skipper	1.375
Rock Creek Marsh	2014-08-23	Least Skipper	1.375
Rock Creek Marsh	2014-08-23	Least Skipper	1.375
Rock Creek Marsh	2014-08-23	Least Skipper	1.375
Rock Creek Marsh	2014-08-23	Least Skipper	1.375
Rock Creek Marsh	2014-08-23	Least Skipper	1.375
Rock Creek Marsh	2014-08-23	Least Skipper	1.375
Rock Creek Marsh	2014-08-23	Least Skipper	1.375
Rock Creek Marsh	2014-08-23	Least Skipper	1.375
Rock Creek Marsh	2014-08-23	Least Skipper	1.375
Rock Creek Marsh	2014-08-23	Least Skipper	1.375
Rock Creek Marsh	2014-08-23	Least Skipper	1.375
Rock Creek Marsh	2014-08-23	Least Skipper	1.375
Rock Creek Marsh	2014-08-24	Least Skipper	1.375
Rock Creek Marsh	2014-08-24	Least Skipper	1.375
Rock Creek Marsh	2014-08-24	Least Skipper	1.375
Rock Creek Marsh	2014-08-24	Least Skipper	1.375
Rock Creek Marsh	2014-08-24	Least Skipper	1.375
Rock Creek Marsh	2014-08-24	Least Skipper	1.375
Rock Creek Marsh	2014-08-24	Least Skipper	1.375
Rock Creek Marsh	2014-08-24	Least Skipper	1.375
Rock Creek Marsh	2014-08-24	Least Skipper	1.375
Rock Creek Marsh	2014-08-24	Least Skipper	1.375
Rock Creek Marsh	2014-08-24	Least Skipper	1.375
Rock Creek Marsh	2014-08-24	Least Skipper	1.375
Marietta Sand Prairie	2014-08-02	Least Skipper	2.125
McCoy WMA	2014-07-29	Least Skipper	2.125
McCoy WMA	2014-07-29	Least Skipper	2.125
McCoy WMA	2014-08-04	Least Skipper	2.125
McCoy WMA	2014-08-13	Least Skipper	2.125
Rock Creek Marsh	2014-07-30	Least Skipper	2.125
Rock Creek Marsh	2014-07-30	Least Skipper	2.125
Rock Creek Marsh	2014-08-03	Least Skipper	2.125
Rock Creek Marsh	2014-08-03	Least Skipper	2.125
Rock Creek Marsh	2014-08-03	Least Skipper	2.125
Rock Creek Marsh	2014-08-04	Least Skipper	2.125
Rock Creek Marsh	2014-08-04	Least Skipper	2.125
Rock Creek Marsh	2014-08-04	Least Skipper	2.125
Rock Creek Marsh	2014-08-04	Least Skipper	2.125
Rock Creek Marsh	2014-08-10	Least Skipper	2.125
Rock Creek Marsh	2014-08-17	Least Skipper	2.125
Rock Creek Marsh	2014-08-17	Least Skipper	2.125
Rock Creek Marsh	2014-08-17	Least Skipper	2.125
Rock Creek Marsh	2014-08-17	Least Skipper	2.125
Rock Creek Marsh	2014-08-17	Least Skipper	2.125
Rock Creek Marsh	2014-08-17	Least Skipper	2.125
Rock Creek Marsh	2014-08-17	Least Skipper	2.125
Rock Creek Marsh	2014-08-17	Least Skipper	2.125
Rock Creek Marsh	2014-08-17	Least Skipper	2.125
Rock Creek Marsh	2014-08-17	Least Skipper	2.125
Rock Creek Marsh	2014-08-17	Least Skipper	2.125
Rock Creek Marsh	2014-08-17	Least Skipper	2.125
Rock Creek Marsh	2014-08-17	Least Skipper	2.125
Rock Creek Marsh	2014-08-17	Least Skipper	2.125
Rock Creek Marsh	2014-08-17	Least Skipper	2.125
Rock Creek Marsh	2014-08-17	Least Skipper	2.125
Rock Creek Marsh	2014-08-17	Least Skipper	2.125
Rock Creek Marsh	2014-08-17	Least Skipper	2.125
Rock Creek Marsh	2014-08-17	Least Skipper	2.125
Rock Creek Marsh	2014-08-17	Least Skipper	2.125
Rock Creek Marsh	2014-08-17	Least Skipper	2.125
Rock Creek Marsh	2014-08-17	Least Skipper	2.125
Rock Creek Marsh	2014-08-17	Least Skipper	2.125
Rock Creek Marsh	2014-08-17	Least Skipper	2.125
Rock Creek Marsh	2014-08-17	Least Skipper	2.125
Rock Creek Marsh	2014-08-17	Least Skipper	2.125
Rock Creek Marsh	2014-08-17	Least Skipper	2.125
Rock Creek Marsh	2014-08-22	Least Skipper	2.125
Rock Creek Marsh	2014-08-22	Least Skipper	2.125
Rock Creek Marsh	2014-08-22	Least Skipper	2.125
Rock Creek Marsh	2014-08-22	Least Skipper	2.125
Rock Creek Marsh	2014-08-22	Least Skipper	2.125
Rock Creek Marsh	2014-08-22	Least Skipper	2.125
Rock Creek Marsh	2014-08-22	Least Skipper	2.125
Rock Creek Marsh	2014-08-22	Least Skipper	2.125
Rock Creek Marsh	2014-08-22	Least Skipper	2.125
Rock Creek Marsh	2014-08-22	Least Skipper	2.125
Rock Creek Marsh	2014-08-22	Least Skipper	2.125
Rock Creek Marsh	2014-08-22	Least Skipper	2.125
Rock Creek Marsh	2014-08-23	Least Skipper	2.125
Rock Creek Marsh	2014-08-23	Least Skipper	2.125
Rock Creek Marsh	2014-08-23	Least Skipper	2.125
Rock Creek Marsh	2014-08-23	Least Skipper	2.125
Rock Creek Marsh	2014-08-23	Least Skipper	2.125
Rock Creek Marsh	2014-08-23	Least Skipper	2.125
Rock Creek Marsh	2014-08-23	Least Skipper	2.125
Rock Creek Marsh	2014-08-23	Least Skipper	2.125
Rock Creek Marsh	2014-08-23	Least Skipper	2.125
Rock Creek Marsh	2014-08-23	Least Skipper	2.125
Rock Creek Marsh	2014-08-23	Least Skipper	2.125
Rock Creek Marsh	2014-08-23	Least Skipper	2.125
Rock Creek Marsh	2014-08-23	Least Skipper	2.125
Rock Creek Marsh	2014-08-23	Least Skipper	2.125
Rock Creek Marsh	2014-08-23	Least Skipper	2.125
Rock Creek Marsh	2014-08-23	Least Skipper	2.125
Rock Creek Marsh	2014-08-24	Least Skipper	2.125
Rock Creek Marsh	2014-08-24	Least Skipper	2.125
Rock Creek Marsh	2014-08-24	Least Skipper	2.125
Rock Creek Marsh	2014-08-24	Least Skipper	2.125
Rock Creek Marsh	2014-08-24	Least Skipper	2.125
Rock Creek Marsh	2014-08-24	Least Skipper	2.125
Rock Creek Marsh	2014-08-24	Least Skipper	2.125
Rock Creek Marsh	2014-08-24	Least Skipper	2.125
Rock Creek Marsh	2014-08-24	Least Skipper	2.125
Rock Creek Marsh	2014-08-24	Least Skipper	2.125
Rock Creek Marsh	2014-08-24	Least Skipper	2.125
Rock Creek Marsh	2014-08-24	Least Skipper	2.125
Marietta Sand Prairie	2014-08-02	Least Skipper	3.75
Marietta Sand Prairie	2014-08-02	Least Skipper	3.75
Marietta Sand Prairie	2014-08-16	Least Skipper	3.75
McCoy WMA	2014-07-29	Least Skipper	3.75
McCoy WMA	2014-08-02	Least Skipper	3.75
Rock Creek Marsh	2014-08-03	Least Skipper	3.75
Rock Creek Marsh	2014-08-03	Least Skipper	3.75
Rock Creek Marsh	2014-08-03	Least Skipper	3.75
Rock Creek Marsh	2014-08-04	Least Skipper	3.75
Rock Creek Marsh	2014-08-17	Least Skipper	3.75
Rock Creek Marsh	2014-08-17	Least Skipper	3.75
Rock Creek Marsh	2014-08-17	Least Skipper	3.75
Rock Creek Marsh	2014-08-17	Least Skipper	3.75
Rock Creek Marsh	2014-08-17	Least Skipper	3.75
Rock Creek Marsh	2014-08-17	Least Skipper	3.75
Rock Creek Marsh	2014-08-17	Least Skipper	3.75
Rock Creek Marsh	2014-08-17	Least Skipper	3.75
Rock Creek Marsh	2014-08-22	Least Skipper	3.75
Rock Creek Marsh	2014-08-22	Least Skipper	3.75
Rock Creek Marsh	2014-08-22	Least Skipper	3.75
Rock Creek Marsh	2014-08-23	Least Skipper	3.75
Rock Creek Marsh	2014-08-23	Least Skipper	3.75
Rock Creek Marsh	2014-08-23	Least Skipper	3.75
Rock Creek Marsh	2014-08-23	Least Skipper	3.75
Rock Creek Marsh	2014-08-23	Least Skipper	3.75
Rock Creek Marsh	2014-08-23	Least Skipper	3.75
Rock Creek Marsh	2014-08-23	Least Skipper	3.75
Rock Creek Marsh	2014-08-23	Least Skipper	3.75
Rock Creek Marsh	2014-08-23	Least Skipper	3.75
Rock Creek Marsh	2014-08-23	Least Skipper	3.75
Rock Creek Marsh	2014-08-24	Least Skipper	3.75
Rock Creek Marsh	2014-08-24	Least Skipper	3.75
Rock Creek Marsh	2014-08-24	Least Skipper	3.75
Rock Creek Marsh	2014-08-24	Least Skipper	3.75
Marietta Sand Prairie	2014-08-17	Least Skipper	7.5
Marietta Sand Prairie	2014-08-17	Least Skipper	7.5
Rock Creek Marsh	2014-08-17	Least Skipper	7.5
Rock Creek Marsh	2014-08-17	Least Skipper	7.5
Rock Creek Marsh	2014-08-22	Least Skipper	7.5
Rock Creek Marsh	2014-08-24	Least Skipper	7.5
Rock Creek Marsh	2014-08-24	Least Skipper	7.5
Marietta Sand Prairie	2014-07-24	Little Yellow	0.5
Marietta Sand Prairie	2014-07-24	Little Yellow	0.5
Marietta Sand Prairie	2014-07-24	Little Yellow	0.5
Marietta Sand Prairie	2014-07-24	Little Yellow	0.5
Marietta Sand Prairie	2014-07-24	Little Yellow	0.5
Marietta Sand Prairie	2014-07-24	Little Yellow	0.5
Marietta Sand Prairie	2014-07-24	Little Yellow	0.5
Marietta Sand Prairie	2014-07-24	Little Yellow	0.5
Marietta Sand Prairie	2014-07-24	Little Yellow	0.5
Marietta Sand Prairie	2014-07-24	Little Yellow	0.5
Marietta Sand Prairie	2014-07-24	Little Yellow	0.5
Marietta Sand Prairie	2014-07-24	Little Yellow	0.5
Marietta Sand Prairie	2014-07-24	Little Yellow	0.5
Marietta Sand Prairie	2014-08-02	Little Yellow	0.5
Marietta Sand Prairie	2014-08-02	Little Yellow	0.5
Marietta Sand Prairie	2014-08-02	Little Yellow	0.5
Marietta Sand Prairie	2014-08-02	Little Yellow	0.5
Marietta Sand Prairie	2014-08-02	Little Yellow	0.5
Marietta Sand Prairie	2014-08-02	Little Yellow	0.5
Marietta Sand Prairie	2014-08-02	Little Yellow	0.5
Marietta Sand Prairie	2014-08-02	Little Yellow	0.5
Marietta Sand Prairie	2014-08-02	Little Yellow	0.5
Marietta Sand Prairie	2014-08-02	Little Yellow	0.5
Marietta Sand Prairie	2014-08-02	Little Yellow	0.5
Marietta Sand Prairie	2014-08-02	Little Yellow	0.5
Marietta Sand Prairie	2014-08-02	Little Yellow	0.5
Marietta Sand Prairie	2014-08-02	Little Yellow	0.5
Marietta Sand Prairie	2014-08-02	Little Yellow	0.5
Marietta Sand Prairie	2014-08-02	Little Yellow	0.5
Marietta Sand Prairie	2014-08-02	Little Yellow	0.5
Marietta Sand Prairie	2014-08-02	Little Yellow	0.5
Marietta Sand Prairie	2014-08-02	Little Yellow	0.5
Marietta Sand Prairie	2014-08-03	Little Yellow	0.5
Marietta Sand Prairie	2014-08-03	Little Yellow	0.5
Marietta Sand Prairie	2014-08-03	Little Yellow	0.5
Marietta Sand Prairie	2014-08-03	Little Yellow	0.5
Marietta Sand Prairie	2014-08-03	Little Yellow	0.5
Marietta Sand Prairie	2014-08-03	Little Yellow	0.5
Marietta Sand Prairie	2014-08-03	Little Yellow	0.5
Marietta Sand Prairie	2014-08-03	Little Yellow	0.5
Marietta Sand Prairie	2014-08-03	Little Yellow	0.5
Marietta Sand Prairie	2014-08-03	Little Yellow	0.5
Marietta Sand Prairie	2014-08-03	Little Yellow	0.5
Marietta Sand Prairie	2014-08-03	Little Yellow	0.5
Marietta Sand Prairie	2014-08-03	Little Yellow	0.5
Marietta Sand Prairie	2014-08-03	Little Yellow	0.5
Marietta Sand Prairie	2014-08-03	Little Yellow	0.5
Marietta Sand Prairie	2014-08-03	Little Yellow	0.5
Marietta Sand Prairie	2014-08-03	Little Yellow	0.5
Marietta Sand Prairie	2014-08-03	Little Yellow	0.5
Marietta Sand Prairie	2014-08-05	Little Yellow	0.5
Marietta Sand Prairie	2014-08-14	Little Yellow	0.5
Marietta Sand Prairie	2014-08-14	Little Yellow	0.5
Marietta Sand Prairie	2014-08-14	Little Yellow	0.5
Marietta Sand Prairie	2014-08-16	Little Yellow	0.5
Marietta Sand Prairie	2014-08-16	Little Yellow	0.5
Marietta Sand Prairie	2014-08-16	Little Yellow	0.5
Marietta Sand Prairie	2014-08-17	Little Yellow	0.5
Marietta Sand Prairie	2014-08-17	Little Yellow	0.5
Marietta Sand Prairie	2014-08-17	Little Yellow	0.5
Marietta Sand Prairie	2014-08-17	Little Yellow	0.5
Marietta Sand Prairie	2014-08-17	Little Yellow	0.5
Marietta Sand Prairie	2014-08-17	Little Yellow	0.5
Marietta Sand Prairie	2014-08-17	Little Yellow	0.5
Marietta Sand Prairie	2014-08-17	Little Yellow	0.5
Marietta Sand Prairie	2014-08-17	Little Yellow	0.5
Marietta Sand Prairie	2014-08-22	Little Yellow	0.5
Marietta Sand Prairie	2014-08-22	Little Yellow	0.5
Marietta Sand Prairie	2014-08-22	Little Yellow	0.5
Marietta Sand Prairie	2014-08-22	Little Yellow	0.5
Marietta Sand Prairie	2014-08-22	Little Yellow	0.5
Marietta Sand Prairie	2014-08-22	Little Yellow	0.5
Marietta Sand Prairie	2014-08-22	Little Yellow	0.5
Marietta Sand Prairie	2014-07-24	Little Yellow	1.375
Marietta Sand Prairie	2014-07-24	Little Yellow	1.375
Marietta Sand Prairie	2014-07-24	Little Yellow	1.375
Marietta Sand Prairie	2014-07-24	Little Yellow	1.375
Marietta Sand Prairie	2014-07-24	Little Yellow	1.375
Marietta Sand Prairie	2014-07-24	Little Yellow	1.375
Marietta Sand Prairie	2014-07-24	Little Yellow	1.375
Marietta Sand Prairie	2014-07-24	Little Yellow	1.375
Marietta Sand Prairie	2014-07-24	Little Yellow	1.375
Marietta Sand Prairie	2014-07-24	Little Yellow	1.375
Marietta Sand Prairie	2014-07-24	Little Yellow	1.375
Marietta Sand Prairie	2014-08-02	Little Yellow	1.375
Marietta Sand Prairie	2014-08-02	Little Yellow	1.375
Marietta Sand Prairie	2014-08-02	Little Yellow	1.375
Marietta Sand Prairie	2014-08-02	Little Yellow	1.375
Marietta Sand Prairie	2014-08-02	Little Yellow	1.375
Marietta Sand Prairie	2014-08-02	Little Yellow	1.375
Marietta Sand Prairie	2014-08-02	Little Yellow	1.375
Marietta Sand Prairie	2014-08-02	Little Yellow	1.375
Marietta Sand Prairie	2014-08-02	Little Yellow	1.375
Marietta Sand Prairie	2014-08-02	Little Yellow	1.375
Marietta Sand Prairie	2014-08-02	Little Yellow	1.375
Marietta Sand Prairie	2014-08-02	Little Yellow	1.375
Marietta Sand Prairie	2014-08-02	Little Yellow	1.375
Marietta Sand Prairie	2014-08-02	Little Yellow	1.375
Marietta Sand Prairie	2014-08-02	Little Yellow	1.375
Marietta Sand Prairie	2014-08-02	Little Yellow	1.375
Marietta Sand Prairie	2014-08-03	Little Yellow	1.375
Marietta Sand Prairie	2014-08-03	Little Yellow	1.375
Marietta Sand Prairie	2014-08-03	Little Yellow	1.375
Marietta Sand Prairie	2014-08-03	Little Yellow	1.375
Marietta Sand Prairie	2014-08-03	Little Yellow	1.375
Marietta Sand Prairie	2014-08-03	Little Yellow	1.375
Marietta Sand Prairie	2014-08-03	Little Yellow	1.375
Marietta Sand Prairie	2014-08-03	Little Yellow	1.375
Marietta Sand Prairie	2014-08-03	Little Yellow	1.375
Marietta Sand Prairie	2014-08-03	Little Yellow	1.375
Marietta Sand Prairie	2014-08-03	Little Yellow	1.375
Marietta Sand Prairie	2014-08-03	Little Yellow	1.375
Marietta Sand Prairie	2014-08-03	Little Yellow	1.375
Marietta Sand Prairie	2014-08-03	Little Yellow	1.375
Marietta Sand Prairie	2014-08-03	Little Yellow	1.375
Marietta Sand Prairie	2014-08-05	Little Yellow	1.375
Marietta Sand Prairie	2014-08-05	Little Yellow	1.375
Marietta Sand Prairie	2014-08-05	Little Yellow	1.375
Marietta Sand Prairie	2014-08-14	Little Yellow	1.375
Marietta Sand Prairie	2014-08-14	Little Yellow	1.375
Marietta Sand Prairie	2014-08-16	Little Yellow	1.375
Marietta Sand Prairie	2014-08-17	Little Yellow	1.375
Marietta Sand Prairie	2014-08-17	Little Yellow	1.375
Marietta Sand Prairie	2014-08-17	Little Yellow	1.375
Marietta Sand Prairie	2014-08-17	Little Yellow	1.375
Marietta Sand Prairie	2014-08-22	Little Yellow	1.375
Marietta Sand Prairie	2014-08-22	Little Yellow	1.375
Marietta Sand Prairie	2014-08-22	Little Yellow	1.375
Marietta Sand Prairie	2014-08-22	Little Yellow	1.375
Marietta Sand Prairie	2014-07-24	Little Yellow	2.125
Marietta Sand Prairie	2014-07-24	Little Yellow	2.125
Marietta Sand Prairie	2014-07-24	Little Yellow	2.125
Marietta Sand Prairie	2014-07-24	Little Yellow	2.125
Marietta Sand Prairie	2014-07-24	Little Yellow	2.125
Marietta Sand Prairie	2014-07-24	Little Yellow	2.125
Marietta Sand Prairie	2014-07-24	Little Yellow	2.125
Marietta Sand Prairie	2014-07-24	Little Yellow	2.125
Marietta Sand Prairie	2014-07-24	Little Yellow	2.125
Marietta Sand Prairie	2014-07-24	Little Yellow	2.125
Marietta Sand Prairie	2014-08-02	Little Yellow	2.125
Marietta Sand Prairie	2014-08-02	Little Yellow	2.125
Marietta Sand Prairie	2014-08-02	Little Yellow	2.125
Marietta Sand Prairie	2014-08-02	Little Yellow	2.125
Marietta Sand Prairie	2014-08-02	Little Yellow	2.125
Marietta Sand Prairie	2014-08-02	Little Yellow	2.125
Marietta Sand Prairie	2014-08-02	Little Yellow	2.125
Marietta Sand Prairie	2014-08-02	Little Yellow	2.125
Marietta Sand Prairie	2014-08-02	Little Yellow	2.125
Marietta Sand Prairie	2014-08-02	Little Yellow	2.125
Marietta Sand Prairie	2014-08-02	Little Yellow	2.125
Marietta Sand Prairie	2014-08-02	Little Yellow	2.125
Marietta Sand Prairie	2014-08-02	Little Yellow	2.125
Marietta Sand Prairie	2014-08-02	Little Yellow	2.125
Marietta Sand Prairie	2014-08-02	Little Yellow	2.125
Marietta Sand Prairie	2014-08-03	Little Yellow	2.125
Marietta Sand Prairie	2014-08-03	Little Yellow	2.125
Marietta Sand Prairie	2014-08-03	Little Yellow	2.125
Marietta Sand Prairie	2014-08-03	Little Yellow	2.125
Marietta Sand Prairie	2014-08-03	Little Yellow	2.125
Marietta Sand Prairie	2014-08-03	Little Yellow	2.125
Marietta Sand Prairie	2014-08-03	Little Yellow	2.125
Marietta Sand Prairie	2014-08-03	Little Yellow	2.125
Marietta Sand Prairie	2014-08-03	Little Yellow	2.125
Marietta Sand Prairie	2014-08-03	Little Yellow	2.125
Marietta Sand Prairie	2014-08-03	Little Yellow	2.125
Marietta Sand Prairie	2014-08-03	Little Yellow	2.125
Marietta Sand Prairie	2014-08-03	Little Yellow	2.125
Marietta Sand Prairie	2014-08-03	Little Yellow	2.125
Marietta Sand Prairie	2014-08-03	Little Yellow	2.125
Marietta Sand Prairie	2014-08-03	Little Yellow	2.125
Marietta Sand Prairie	2014-08-05	Little Yellow	2.125
Marietta Sand Prairie	2014-08-14	Little Yellow	2.125
Marietta Sand Prairie	2014-08-14	Little Yellow	2.125
Marietta Sand Prairie	2014-08-14	Little Yellow	2.125
Marietta Sand Prairie	2014-08-16	Little Yellow	2.125
Marietta Sand Prairie	2014-08-16	Little Yellow	2.125
Marietta Sand Prairie	2014-08-17	Little Yellow	2.125
Marietta Sand Prairie	2014-08-17	Little Yellow	2.125
Marietta Sand Prairie	2014-08-17	Little Yellow	2.125
Marietta Sand Prairie	2014-08-17	Little Yellow	2.125
Marietta Sand Prairie	2014-08-17	Little Yellow	2.125
Marietta Sand Prairie	2014-08-17	Little Yellow	2.125
Marietta Sand Prairie	2014-08-17	Little Yellow	2.125
Marietta Sand Prairie	2014-08-22	Little Yellow	2.125
Marietta Sand Prairie	2014-08-22	Little Yellow	2.125
Marietta Sand Prairie	2014-08-22	Little Yellow	2.125
Marietta Sand Prairie	2014-08-22	Little Yellow	2.125
Marietta Sand Prairie	2014-07-24	Little Yellow	3.75
Marietta Sand Prairie	2014-07-24	Little Yellow	3.75
Marietta Sand Prairie	2014-07-24	Little Yellow	3.75
Marietta Sand Prairie	2014-07-24	Little Yellow	3.75
Marietta Sand Prairie	2014-07-24	Little Yellow	3.75
Marietta Sand Prairie	2014-07-24	Little Yellow	3.75
Marietta Sand Prairie	2014-07-24	Little Yellow	3.75
Marietta Sand Prairie	2014-07-24	Little Yellow	3.75
Marietta Sand Prairie	2014-07-24	Little Yellow	3.75
Marietta Sand Prairie	2014-08-02	Little Yellow	3.75
Marietta Sand Prairie	2014-08-02	Little Yellow	3.75
Marietta Sand Prairie	2014-08-02	Little Yellow	3.75
Marietta Sand Prairie	2014-08-02	Little Yellow	3.75
Marietta Sand Prairie	2014-08-02	Little Yellow	3.75
Marietta Sand Prairie	2014-08-02	Little Yellow	3.75
Marietta Sand Prairie	2014-08-02	Little Yellow	3.75
Marietta Sand Prairie	2014-08-02	Little Yellow	3.75
Marietta Sand Prairie	2014-08-02	Little Yellow	3.75
Marietta Sand Prairie	2014-08-02	Little Yellow	3.75
Marietta Sand Prairie	2014-08-02	Little Yellow	3.75
Marietta Sand Prairie	2014-08-02	Little Yellow	3.75
Marietta Sand Prairie	2014-08-03	Little Yellow	3.75
Marietta Sand Prairie	2014-08-03	Little Yellow	3.75
Marietta Sand Prairie	2014-08-03	Little Yellow	3.75
Marietta Sand Prairie	2014-08-03	Little Yellow	3.75
Marietta Sand Prairie	2014-08-03	Little Yellow	3.75
Marietta Sand Prairie	2014-08-03	Little Yellow	3.75
Marietta Sand Prairie	2014-08-03	Little Yellow	3.75
Marietta Sand Prairie	2014-08-03	Little Yellow	3.75
Marietta Sand Prairie	2014-08-03	Little Yellow	3.75
Marietta Sand Prairie	2014-08-03	Little Yellow	3.75
Marietta Sand Prairie	2014-08-03	Little Yellow	3.75
Marietta Sand Prairie	2014-08-03	Little Yellow	3.75
Marietta Sand Prairie	2014-08-03	Little Yellow	3.75
Marietta Sand Prairie	2014-08-03	Little Yellow	3.75
Marietta Sand Prairie	2014-08-03	Little Yellow	3.75
Marietta Sand Prairie	2014-08-03	Little Yellow	3.75
Marietta Sand Prairie	2014-08-03	Little Yellow	3.75
Marietta Sand Prairie	2014-08-03	Little Yellow	3.75
Marietta Sand Prairie	2014-08-03	Little Yellow	3.75
Marietta Sand Prairie	2014-08-03	Little Yellow	3.75
Marietta Sand Prairie	2014-08-03	Little Yellow	3.75
Marietta Sand Prairie	2014-08-05	Little Yellow	3.75
Marietta Sand Prairie	2014-08-14	Little Yellow	3.75
Marietta Sand Prairie	2014-08-14	Little Yellow	3.75
Marietta Sand Prairie	2014-08-16	Little Yellow	3.75
Marietta Sand Prairie	2014-08-17	Little Yellow	3.75
Marietta Sand Prairie	2014-08-17	Little Yellow	3.75
Marietta Sand Prairie	2014-08-17	Little Yellow	3.75
Marietta Sand Prairie	2014-08-17	Little Yellow	3.75
Marietta Sand Prairie	2014-08-17	Little Yellow	3.75
Marietta Sand Prairie	2014-08-17	Little Yellow	3.75
Marietta Sand Prairie	2014-08-17	Little Yellow	3.75
Marietta Sand Prairie	2014-08-17	Little Yellow	3.75
Marietta Sand Prairie	2014-08-17	Little Yellow	3.75
Marietta Sand Prairie	2014-08-17	Little Yellow	3.75
Marietta Sand Prairie	2014-08-17	Little Yellow	3.75
Marietta Sand Prairie	2014-08-22	Little Yellow	3.75
Marietta Sand Prairie	2014-08-22	Little Yellow	3.75
Marietta Sand Prairie	2014-08-22	Little Yellow	3.75
Marietta Sand Prairie	2014-08-22	Little Yellow	3.75
Marietta Sand Prairie	2014-08-22	Little Yellow	3.75
Marietta Sand Prairie	2014-08-22	Little Yellow	3.75
Marietta Sand Prairie	2014-08-22	Little Yellow	3.75
Marietta Sand Prairie	2014-08-22	Little Yellow	3.75
Marietta Sand Prairie	2014-07-24	Little Yellow	7.5
Marietta Sand Prairie	2014-07-24	Little Yellow	7.5
Marietta Sand Prairie	2014-07-24	Little Yellow	7.5
Marietta Sand Prairie	2014-07-24	Little Yellow	7.5
Marietta Sand Prairie	2014-07-24	Little Yellow	7.5
Marietta Sand Prairie	2014-07-24	Little Yellow	7.5
Marietta Sand Prairie	2014-07-24	Little Yellow	7.5
Marietta Sand Prairie	2014-07-24	Little Yellow	7.5
Marietta Sand Prairie	2014-08-02	Little Yellow	7.5
Marietta Sand Prairie	2014-08-02	Little Yellow	7.5
Marietta Sand Prairie	2014-08-02	Little Yellow	7.5
Marietta Sand Prairie	2014-08-02	Little Yellow	7.5
Marietta Sand Prairie	2014-08-02	Little Yellow	7.5
Marietta Sand Prairie	2014-08-02	Little Yellow	7.5
Marietta Sand Prairie	2014-08-02	Little Yellow	7.5
Marietta Sand Prairie	2014-08-02	Little Yellow	7.5
Marietta Sand Prairie	2014-08-02	Little Yellow	7.5
Marietta Sand Prairie	2014-08-02	Little Yellow	7.5
Marietta Sand Prairie	2014-08-02	Little Yellow	7.5
Marietta Sand Prairie	2014-08-02	Little Yellow	7.5
Marietta Sand Prairie	2014-08-02	Little Yellow	7.5
Marietta Sand Prairie	2014-08-02	Little Yellow	7.5
Marietta Sand Prairie	2014-08-02	Little Yellow	7.5
Marietta Sand Prairie	2014-08-02	Little Yellow	7.5
Marietta Sand Prairie	2014-08-02	Little Yellow	7.5
Marietta Sand Prairie	2014-08-03	Little Yellow	7.5
Marietta Sand Prairie	2014-08-03	Little Yellow	7.5
Marietta Sand Prairie	2014-08-03	Little Yellow	7.5
Marietta Sand Prairie	2014-08-03	Little Yellow	7.5
Marietta Sand Prairie	2014-08-03	Little Yellow	7.5
Marietta Sand Prairie	2014-08-03	Little Yellow	7.5
Marietta Sand Prairie	2014-08-03	Little Yellow	7.5
Marietta Sand Prairie	2014-08-03	Little Yellow	7.5
Marietta Sand Prairie	2014-08-03	Little Yellow	7.5
Marietta Sand Prairie	2014-08-03	Little Yellow	7.5
Marietta Sand Prairie	2014-08-03	Little Yellow	7.5
Marietta Sand Prairie	2014-08-03	Little Yellow	7.5
Marietta Sand Prairie	2014-08-03	Little Yellow	7.5
Marietta Sand Prairie	2014-08-03	Little Yellow	7.5
Marietta Sand Prairie	2014-08-03	Little Yellow	7.5
Marietta Sand Prairie	2014-08-03	Little Yellow	7.5
Marietta Sand Prairie	2014-08-05	Little Yellow	7.5
Marietta Sand Prairie	2014-08-14	Little Yellow	7.5
Marietta Sand Prairie	2014-08-14	Little Yellow	7.5
Marietta Sand Prairie	2014-08-14	Little Yellow	7.5
Marietta Sand Prairie	2014-08-16	Little Yellow	7.5
Marietta Sand Prairie	2014-08-16	Little Yellow	7.5
Marietta Sand Prairie	2014-08-16	Little Yellow	7.5
Marietta Sand Prairie	2014-08-17	Little Yellow	7.5
Marietta Sand Prairie	2014-08-17	Little Yellow	7.5
Marietta Sand Prairie	2014-08-17	Little Yellow	7.5
Marietta Sand Prairie	2014-08-17	Little Yellow	7.5
Marietta Sand Prairie	2014-08-17	Little Yellow	7.5
Marietta Sand Prairie	2014-08-17	Little Yellow	7.5
Marietta Sand Prairie	2014-08-17	Little Yellow	7.5
Marietta Sand Prairie	2014-08-17	Little Yellow	7.5
Marietta Sand Prairie	2014-08-17	Little Yellow	7.5
Marietta Sand Prairie	2014-08-17	Little Yellow	7.5
Marietta Sand Prairie	2014-08-17	Little Yellow	7.5
Marietta Sand Prairie	2014-08-22	Little Yellow	7.5
Marietta Sand Prairie	2014-08-22	Little Yellow	7.5
Marietta Sand Prairie	2014-08-22	Little Yellow	7.5
Marietta Sand Prairie	2014-08-22	Little Yellow	7.5
Marietta Sand Prairie	2014-08-22	Little Yellow	7.5
Marietta Sand Prairie	2014-07-24	Little Yellow	17.5
Marietta Sand Prairie	2014-07-24	Little Yellow	17.5
Marietta Sand Prairie	2014-07-24	Little Yellow	17.5
Marietta Sand Prairie	2014-07-24	Little Yellow	17.5
Marietta Sand Prairie	2014-07-24	Little Yellow	17.5
Marietta Sand Prairie	2014-07-24	Little Yellow	17.5
Marietta Sand Prairie	2014-07-24	Little Yellow	17.5
Marietta Sand Prairie	2014-07-24	Little Yellow	17.5
Marietta Sand Prairie	2014-07-24	Little Yellow	17.5
Marietta Sand Prairie	2014-07-24	Little Yellow	17.5
Marietta Sand Prairie	2014-07-24	Little Yellow	17.5
Marietta Sand Prairie	2014-07-24	Little Yellow	17.5
Marietta Sand Prairie	2014-07-24	Little Yellow	17.5
Marietta Sand Prairie	2014-08-02	Little Yellow	17.5
Marietta Sand Prairie	2014-08-02	Little Yellow	17.5
Marietta Sand Prairie	2014-08-02	Little Yellow	17.5
Marietta Sand Prairie	2014-08-02	Little Yellow	17.5
Marietta Sand Prairie	2014-08-02	Little Yellow	17.5
Marietta Sand Prairie	2014-08-02	Little Yellow	17.5
Marietta Sand Prairie	2014-08-02	Little Yellow	17.5
Marietta Sand Prairie	2014-08-02	Little Yellow	17.5
Marietta Sand Prairie	2014-08-02	Little Yellow	17.5
Marietta Sand Prairie	2014-08-02	Little Yellow	17.5
Marietta Sand Prairie	2014-08-02	Little Yellow	17.5
Marietta Sand Prairie	2014-08-03	Little Yellow	17.5
Marietta Sand Prairie	2014-08-03	Little Yellow	17.5
Marietta Sand Prairie	2014-08-03	Little Yellow	17.5
Marietta Sand Prairie	2014-08-03	Little Yellow	17.5
Marietta Sand Prairie	2014-08-03	Little Yellow	17.5
Marietta Sand Prairie	2014-08-03	Little Yellow	17.5
Marietta Sand Prairie	2014-08-03	Little Yellow	17.5
Marietta Sand Prairie	2014-08-03	Little Yellow	17.5
Marietta Sand Prairie	2014-08-03	Little Yellow	17.5
Marietta Sand Prairie	2014-08-03	Little Yellow	17.5
Marietta Sand Prairie	2014-08-03	Little Yellow	17.5
Marietta Sand Prairie	2014-08-03	Little Yellow	17.5
Marietta Sand Prairie	2014-08-03	Little Yellow	17.5
Marietta Sand Prairie	2014-08-03	Little Yellow	17.5
Marietta Sand Prairie	2014-08-05	Little Yellow	17.5
Marietta Sand Prairie	2014-08-05	Little Yellow	17.5
Marietta Sand Prairie	2014-08-05	Little Yellow	17.5
Marietta Sand Prairie	2014-08-14	Little Yellow	17.5
Marietta Sand Prairie	2014-08-14	Little Yellow	17.5
Marietta Sand Prairie	2014-08-16	Little Yellow	17.5
Marietta Sand Prairie	2014-08-16	Little Yellow	17.5
Marietta Sand Prairie	2014-08-17	Little Yellow	17.5
Marietta Sand Prairie	2014-08-17	Little Yellow	17.5
Marietta Sand Prairie	2014-08-17	Little Yellow	17.5
Marietta Sand Prairie	2014-08-17	Little Yellow	17.5
Marietta Sand Prairie	2014-08-17	Little Yellow	17.5
Marietta Sand Prairie	2014-08-17	Little Yellow	17.5
Marietta Sand Prairie	2014-08-22	Little Yellow	17.5
Marietta Sand Prairie	2014-08-22	Little Yellow	17.5
Marietta Sand Prairie	2014-08-22	Little Yellow	17.5
Marietta Sand Prairie	2014-08-22	Little Yellow	17.5
Marietta Sand Prairie	2014-07-24	Little Yellow	37.5
Marietta Sand Prairie	2014-07-24	Little Yellow	37.5
Marietta Sand Prairie	2014-07-24	Little Yellow	37.5
Marietta Sand Prairie	2014-07-24	Little Yellow	37.5
Marietta Sand Prairie	2014-08-02	Little Yellow	37.5
Marietta Sand Prairie	2014-08-02	Little Yellow	37.5
Marietta Sand Prairie	2014-08-02	Little Yellow	37.5
Marietta Sand Prairie	2014-08-02	Little Yellow	37.5
Marietta Sand Prairie	2014-08-03	Little Yellow	37.5
Marietta Sand Prairie	2014-08-03	Little Yellow	37.5
Marietta Sand Prairie	2014-08-03	Little Yellow	37.5
Marietta Sand Prairie	2014-08-03	Little Yellow	37.5
Marietta Sand Prairie	2014-08-03	Little Yellow	37.5
Marietta Sand Prairie	2014-08-03	Little Yellow	37.5
Marietta Sand Prairie	2014-08-05	Little Yellow	37.5
Marietta Sand Prairie	2014-08-05	Little Yellow	37.5
Marietta Sand Prairie	2014-08-14	Little Yellow	37.5
Marietta Sand Prairie	2014-08-14	Little Yellow	37.5
Marietta Sand Prairie	2014-08-14	Little Yellow	37.5
Marietta Sand Prairie	2014-08-14	Little Yellow	37.5
Marietta Sand Prairie	2014-08-16	Little Yellow	37.5
Marietta Sand Prairie	2014-08-16	Little Yellow	37.5
Marietta Sand Prairie	2014-08-16	Little Yellow	37.5
Marietta Sand Prairie	2014-08-17	Little Yellow	37.5
Marietta Sand Prairie	2014-08-17	Little Yellow	37.5
Marietta Sand Prairie	2014-08-17	Little Yellow	37.5
Marietta Sand Prairie	2014-08-17	Little Yellow	37.5
Marietta Sand Prairie	2014-08-17	Little Yellow	37.5
Marietta Sand Prairie	2014-08-22	Little Yellow	37.5
Marietta Sand Prairie	2014-08-22	Little Yellow	37.5
Marietta Sand Prairie	2014-08-02	Little Yellow	75
Marietta Sand Prairie	2014-08-02	Little Yellow	75
Marietta Sand Prairie	2014-08-03	Little Yellow	75
Marietta Sand Prairie	2014-08-05	Little Yellow	75
Marietta Sand Prairie	2014-08-14	Little Yellow	75
Marietta Sand Prairie	2014-08-16	Little Yellow	75
Marietta Sand Prairie	2014-08-16	Little Yellow	75
Marietta Sand Prairie	2014-08-16	Little Yellow	75
Marietta Sand Prairie	2014-08-17	Little Yellow	75
Marietta Sand Prairie	2014-08-17	Little Yellow	75
Marietta Sand Prairie	2014-08-17	Little Yellow	75
Marietta Sand Prairie	2014-08-22	Little Yellow	75
Marietta Sand Prairie	2014-08-22	Little Yellow	75
Marietta Sand Prairie	2014-08-03	Meadow Fritillary	1.375
Marietta Sand Prairie	2014-08-05	Meadow Fritillary	2.125
Harrier Marsh	2014-07-29	Monarch	0.5
Harrier Marsh	2014-07-29	Monarch	0.5
Harrier Marsh	2014-07-30	Monarch	0.5
Harrier Marsh	2014-07-30	Monarch	0.5
Harrier Marsh	2014-07-30	Monarch	0.5
Harrier Marsh	2014-08-02	Monarch	0.5
Harrier Marsh	2014-08-02	Monarch	0.5
Harrier Marsh	2014-08-02	Monarch	0.5
Harrier Marsh	2014-08-02	Monarch	0.5
Harrier Marsh	2014-08-02	Monarch	0.5
Harrier Marsh	2014-08-05	Monarch	0.5
Harrier Marsh	2014-08-05	Monarch	0.5
Marietta Sand Prairie	2014-07-24	Monarch	0.5
Marietta Sand Prairie	2014-08-03	Monarch	0.5
Marietta Sand Prairie	2014-08-03	Monarch	0.5
Marietta Sand Prairie	2014-08-14	Monarch	0.5
Marietta Sand Prairie	2014-08-16	Monarch	0.5
Marietta Sand Prairie	2014-08-16	Monarch	0.5
Marietta Sand Prairie	2014-08-17	Monarch	0.5
Marietta Sand Prairie	2014-08-17	Monarch	0.5
Marietta Sand Prairie	2014-08-22	Monarch	0.5
Marietta Sand Prairie	2014-08-22	Monarch	0.5
Rock Creek Marsh	2014-08-03	Monarch	0.5
Rock Creek Marsh	2014-08-10	Monarch	0.5
Harrier Marsh	2014-08-11	Monarch	0.5
Harrier Marsh	2014-08-11	Monarch	0.5
Harrier Marsh	2014-08-11	Monarch	0.5
Harrier Marsh	2014-07-29	Monarch	1.375
Harrier Marsh	2014-07-29	Monarch	1.375
Harrier Marsh	2014-07-29	Monarch	1.375
Harrier Marsh	2014-07-30	Monarch	1.375
Harrier Marsh	2014-07-30	Monarch	1.375
Harrier Marsh	2014-07-30	Monarch	1.375
Harrier Marsh	2014-07-30	Monarch	1.375
Harrier Marsh	2014-07-30	Monarch	1.375
Harrier Marsh	2014-08-02	Monarch	1.375
Harrier Marsh	2014-08-02	Monarch	1.375
Harrier Marsh	2014-08-02	Monarch	1.375
Harrier Marsh	2014-08-02	Monarch	1.375
Harrier Marsh	2014-08-02	Monarch	1.375
Harrier Marsh	2014-08-05	Monarch	1.375
Harrier Marsh	2014-08-05	Monarch	1.375
Harrier Marsh	2014-08-21	Monarch	1.375
Harrier Marsh	2014-08-21	Monarch	1.375
Marietta Sand Prairie	2014-07-24	Monarch	1.375
Marietta Sand Prairie	2014-07-24	Monarch	1.375
Marietta Sand Prairie	2014-08-03	Monarch	1.375
Marietta Sand Prairie	2014-08-03	Monarch	1.375
Marietta Sand Prairie	2014-08-03	Monarch	1.375
Marietta Sand Prairie	2014-08-14	Monarch	1.375
Marietta Sand Prairie	2014-08-16	Monarch	1.375
Rock Creek Marsh	2014-08-04	Monarch	1.375
Rock Creek Marsh	2014-08-04	Monarch	1.375
Harrier Marsh	2014-08-11	Monarch	1.375
Harrier Marsh	2014-08-11	Monarch	1.375
Harrier Marsh	2014-08-11	Monarch	1.375
Harrier Marsh	2014-08-11	Monarch	1.375
Harrier Marsh	2014-07-29	Monarch	2.125
Harrier Marsh	2014-07-29	Monarch	2.125
Harrier Marsh	2014-07-29	Monarch	2.125
Harrier Marsh	2014-07-29	Monarch	2.125
Harrier Marsh	2014-07-30	Monarch	2.125
Harrier Marsh	2014-07-30	Monarch	2.125
Harrier Marsh	2014-07-30	Monarch	2.125
Harrier Marsh	2014-07-30	Monarch	2.125
Harrier Marsh	2014-07-30	Monarch	2.125
Harrier Marsh	2014-07-30	Monarch	2.125
Harrier Marsh	2014-07-30	Monarch	2.125
Harrier Marsh	2014-07-30	Monarch	2.125
Harrier Marsh	2014-07-30	Monarch	2.125
Harrier Marsh	2014-07-30	Monarch	2.125
Harrier Marsh	2014-08-02	Monarch	2.125
Harrier Marsh	2014-08-02	Monarch	2.125
Harrier Marsh	2014-08-02	Monarch	2.125
Harrier Marsh	2014-08-02	Monarch	2.125
Harrier Marsh	2014-08-02	Monarch	2.125
Harrier Marsh	2014-08-02	Monarch	2.125
Harrier Marsh	2014-08-05	Monarch	2.125
Harrier Marsh	2014-08-05	Monarch	2.125
Harrier Marsh	2014-08-05	Monarch	2.125
Harrier Marsh	2014-08-05	Monarch	2.125
Harrier Marsh	2014-08-05	Monarch	2.125
Harrier Marsh	2014-08-18	Monarch	2.125
Harrier Marsh	2014-08-21	Monarch	2.125
Marietta Sand Prairie	2014-07-24	Monarch	2.125
Marietta Sand Prairie	2014-07-24	Monarch	2.125
Marietta Sand Prairie	2014-07-24	Monarch	2.125
Marietta Sand Prairie	2014-07-24	Monarch	2.125
Marietta Sand Prairie	2014-08-03	Monarch	2.125
Marietta Sand Prairie	2014-08-03	Monarch	2.125
Marietta Sand Prairie	2014-08-03	Monarch	2.125
Marietta Sand Prairie	2014-08-03	Monarch	2.125
Marietta Sand Prairie	2014-08-03	Monarch	2.125
Marietta Sand Prairie	2014-08-05	Monarch	2.125
Marietta Sand Prairie	2014-08-05	Monarch	2.125
Marietta Sand Prairie	2014-08-05	Monarch	2.125
Marietta Sand Prairie	2014-08-14	Monarch	2.125
Marietta Sand Prairie	2014-08-17	Monarch	2.125
Marietta Sand Prairie	2014-08-17	Monarch	2.125
Marietta Sand Prairie	2014-08-22	Monarch	2.125
Rock Creek Marsh	2014-08-03	Monarch	2.125
Rock Creek Marsh	2014-08-10	Monarch	2.125
Harrier Marsh	2014-08-11	Monarch	2.125
Harrier Marsh	2014-08-11	Monarch	2.125
Harrier Marsh	2014-07-29	Monarch	3.75
Harrier Marsh	2014-07-29	Monarch	3.75
Harrier Marsh	2014-07-29	Monarch	3.75
Harrier Marsh	2014-07-29	Monarch	3.75
Harrier Marsh	2014-07-29	Monarch	3.75
Harrier Marsh	2014-07-29	Monarch	3.75
Harrier Marsh	2014-07-29	Monarch	3.75
Harrier Marsh	2014-07-29	Monarch	3.75
Harrier Marsh	2014-07-30	Monarch	3.75
Harrier Marsh	2014-07-30	Monarch	3.75
Harrier Marsh	2014-07-30	Monarch	3.75
Harrier Marsh	2014-07-30	Monarch	3.75
Harrier Marsh	2014-07-30	Monarch	3.75
Harrier Marsh	2014-07-30	Monarch	3.75
Harrier Marsh	2014-07-30	Monarch	3.75
Harrier Marsh	2014-08-02	Monarch	3.75
Harrier Marsh	2014-08-02	Monarch	3.75
Harrier Marsh	2014-08-02	Monarch	3.75
Harrier Marsh	2014-08-05	Monarch	3.75
Harrier Marsh	2014-08-05	Monarch	3.75
Harrier Marsh	2014-08-05	Monarch	3.75
Harrier Marsh	2014-08-05	Monarch	3.75
Harrier Marsh	2014-08-21	Monarch	3.75
Harrier Marsh	2014-08-21	Monarch	3.75
Marietta Sand Prairie	2014-08-02	Monarch	3.75
Marietta Sand Prairie	2014-08-03	Monarch	3.75
Marietta Sand Prairie	2014-08-03	Monarch	3.75
Marietta Sand Prairie	2014-08-03	Monarch	3.75
Marietta Sand Prairie	2014-08-03	Monarch	3.75
Marietta Sand Prairie	2014-08-03	Monarch	3.75
Marietta Sand Prairie	2014-08-05	Monarch	3.75
Marietta Sand Prairie	2014-08-05	Monarch	3.75
Marietta Sand Prairie	2014-08-05	Monarch	3.75
Marietta Sand Prairie	2014-08-05	Monarch	3.75
Marietta Sand Prairie	2014-08-14	Monarch	3.75
Marietta Sand Prairie	2014-08-17	Monarch	3.75
Rock Creek Marsh	2014-07-30	Monarch	3.75
Harrier Marsh	2014-08-11	Monarch	3.75
Harrier Marsh	2014-08-11	Monarch	3.75
Harrier Marsh	2014-08-11	Monarch	3.75
Harrier Marsh	2014-07-29	Monarch	7.5
Harrier Marsh	2014-07-29	Monarch	7.5
Harrier Marsh	2014-07-29	Monarch	7.5
Harrier Marsh	2014-07-29	Monarch	7.5
Harrier Marsh	2014-07-29	Monarch	7.5
Harrier Marsh	2014-07-29	Monarch	7.5
Harrier Marsh	2014-07-29	Monarch	7.5
Harrier Marsh	2014-07-29	Monarch	7.5
Harrier Marsh	2014-07-30	Monarch	7.5
Harrier Marsh	2014-07-30	Monarch	7.5
Harrier Marsh	2014-07-30	Monarch	7.5
Harrier Marsh	2014-07-30	Monarch	7.5
Harrier Marsh	2014-07-30	Monarch	7.5
Harrier Marsh	2014-07-30	Monarch	7.5
Harrier Marsh	2014-08-02	Monarch	7.5
Harrier Marsh	2014-08-02	Monarch	7.5
Harrier Marsh	2014-08-02	Monarch	7.5
Harrier Marsh	2014-08-02	Monarch	7.5
Harrier Marsh	2014-08-02	Monarch	7.5
Harrier Marsh	2014-08-02	Monarch	7.5
Harrier Marsh	2014-08-05	Monarch	7.5
Harrier Marsh	2014-08-05	Monarch	7.5
Harrier Marsh	2014-08-18	Monarch	7.5
Harrier Marsh	2014-08-21	Monarch	7.5
Harrier Marsh	2014-08-21	Monarch	7.5
Marietta Sand Prairie	2014-07-24	Monarch	7.5
Marietta Sand Prairie	2014-07-24	Monarch	7.5
Marietta Sand Prairie	2014-07-24	Monarch	7.5
Marietta Sand Prairie	2014-07-24	Monarch	7.5
Marietta Sand Prairie	2014-08-03	Monarch	7.5
Marietta Sand Prairie	2014-08-03	Monarch	7.5
Marietta Sand Prairie	2014-08-03	Monarch	7.5
Marietta Sand Prairie	2014-08-03	Monarch	7.5
Marietta Sand Prairie	2014-08-05	Monarch	7.5
Marietta Sand Prairie	2014-08-14	Monarch	7.5
Marietta Sand Prairie	2014-08-14	Monarch	7.5
Marietta Sand Prairie	2014-08-14	Monarch	7.5
Marietta Sand Prairie	2014-08-22	Monarch	7.5
Rock Creek Marsh	2014-08-04	Monarch	7.5
Rock Creek Marsh	2014-08-10	Monarch	7.5
Harrier Marsh	2014-08-11	Monarch	7.5
Harrier Marsh	2014-08-11	Monarch	7.5
Harrier Marsh	2014-08-11	Monarch	7.5
Harrier Marsh	2014-08-11	Monarch	7.5
Harrier Marsh	2014-07-29	Monarch	17.5
Harrier Marsh	2014-07-29	Monarch	17.5
Harrier Marsh	2014-07-29	Monarch	17.5
Harrier Marsh	2014-07-29	Monarch	17.5
Harrier Marsh	2014-07-29	Monarch	17.5
Harrier Marsh	2014-07-29	Monarch	17.5
Harrier Marsh	2014-07-29	Monarch	17.5
Harrier Marsh	2014-07-29	Monarch	17.5
Harrier Marsh	2014-07-29	Monarch	17.5
Harrier Marsh	2014-07-30	Monarch	17.5
Harrier Marsh	2014-07-30	Monarch	17.5
Harrier Marsh	2014-07-30	Monarch	17.5
Harrier Marsh	2014-07-30	Monarch	17.5
Harrier Marsh	2014-07-30	Monarch	17.5
Harrier Marsh	2014-07-30	Monarch	17.5
Harrier Marsh	2014-07-30	Monarch	17.5
Harrier Marsh	2014-08-02	Monarch	17.5
Harrier Marsh	2014-08-02	Monarch	17.5
Harrier Marsh	2014-08-02	Monarch	17.5
Harrier Marsh	2014-08-02	Monarch	17.5
Harrier Marsh	2014-08-02	Monarch	17.5
Harrier Marsh	2014-08-02	Monarch	17.5
Harrier Marsh	2014-08-02	Monarch	17.5
Harrier Marsh	2014-08-02	Monarch	17.5
Harrier Marsh	2014-08-05	Monarch	17.5
Harrier Marsh	2014-08-05	Monarch	17.5
Harrier Marsh	2014-08-05	Monarch	17.5
Harrier Marsh	2014-08-05	Monarch	17.5
Harrier Marsh	2014-08-18	Monarch	17.5
Harrier Marsh	2014-08-21	Monarch	17.5
Harrier Marsh	2014-08-21	Monarch	17.5
Marietta Sand Prairie	2014-07-24	Monarch	17.5
Marietta Sand Prairie	2014-07-24	Monarch	17.5
Marietta Sand Prairie	2014-07-24	Monarch	17.5
Marietta Sand Prairie	2014-07-24	Monarch	17.5
Marietta Sand Prairie	2014-08-03	Monarch	17.5
Marietta Sand Prairie	2014-08-03	Monarch	17.5
Marietta Sand Prairie	2014-08-03	Monarch	17.5
Marietta Sand Prairie	2014-08-05	Monarch	17.5
Marietta Sand Prairie	2014-08-05	Monarch	17.5
Marietta Sand Prairie	2014-08-05	Monarch	17.5
Marietta Sand Prairie	2014-08-14	Monarch	17.5
Marietta Sand Prairie	2014-08-16	Monarch	17.5
Marietta Sand Prairie	2014-08-16	Monarch	17.5
Marietta Sand Prairie	2014-08-22	Monarch	17.5
Marietta Sand Prairie	2014-08-22	Monarch	17.5
Marietta Sand Prairie	2014-08-22	Monarch	17.5
Marietta Sand Prairie	2014-08-22	Monarch	17.5
Marietta Sand Prairie	2014-08-22	Monarch	17.5
Rock Creek Marsh	2014-07-30	Monarch	17.5
Rock Creek Marsh	2014-08-10	Monarch	17.5
Harrier Marsh	2014-08-11	Monarch	17.5
Harrier Marsh	2014-08-11	Monarch	17.5
Harrier Marsh	2014-08-11	Monarch	17.5
Harrier Marsh	2014-07-29	Monarch	37.5
Harrier Marsh	2014-07-30	Monarch	37.5
Harrier Marsh	2014-07-30	Monarch	37.5
Harrier Marsh	2014-07-30	Monarch	37.5
Harrier Marsh	2014-07-30	Monarch	37.5
Harrier Marsh	2014-07-30	Monarch	37.5
Harrier Marsh	2014-07-30	Monarch	37.5
Harrier Marsh	2014-08-02	Monarch	37.5
Harrier Marsh	2014-08-02	Monarch	37.5
Harrier Marsh	2014-08-02	Monarch	37.5
Harrier Marsh	2014-08-02	Monarch	37.5
Harrier Marsh	2014-08-05	Monarch	37.5
Harrier Marsh	2014-08-05	Monarch	37.5
Harrier Marsh	2014-08-05	Monarch	37.5
Harrier Marsh	2014-08-05	Monarch	37.5
Harrier Marsh	2014-08-05	Monarch	37.5
Harrier Marsh	2014-08-18	Monarch	37.5
Harrier Marsh	2014-08-21	Monarch	37.5
Marietta Sand Prairie	2014-07-24	Monarch	37.5
Marietta Sand Prairie	2014-08-03	Monarch	37.5
Marietta Sand Prairie	2014-08-05	Monarch	37.5
Marietta Sand Prairie	2014-08-05	Monarch	37.5
Marietta Sand Prairie	2014-08-05	Monarch	37.5
Marietta Sand Prairie	2014-08-14	Monarch	37.5
Marietta Sand Prairie	2014-08-14	Monarch	37.5
Marietta Sand Prairie	2014-08-16	Monarch	37.5
Marietta Sand Prairie	2014-08-16	Monarch	37.5
Marietta Sand Prairie	2014-08-17	Monarch	37.5
Marietta Sand Prairie	2014-08-22	Monarch	37.5
Marietta Sand Prairie	2014-08-22	Monarch	37.5
Marietta Sand Prairie	2014-08-22	Monarch	37.5
Rock Creek Marsh	2014-07-30	Monarch	37.5
Rock Creek Marsh	2014-07-30	Monarch	37.5
Rock Creek Marsh	2014-07-30	Monarch	37.5
Harrier Marsh	2014-08-11	Monarch	37.5
Harrier Marsh	2014-08-11	Monarch	37.5
Harrier Marsh	2014-07-29	Monarch	75
Harrier Marsh	2014-07-30	Monarch	75
Harrier Marsh	2014-07-30	Monarch	75
Harrier Marsh	2014-08-02	Monarch	75
Harrier Marsh	2014-08-02	Monarch	75
Harrier Marsh	2014-08-02	Monarch	75
Harrier Marsh	2014-08-05	Monarch	75
Harrier Marsh	2014-08-05	Monarch	75
Harrier Marsh	2014-08-05	Monarch	75
Harrier Marsh	2014-08-21	Monarch	75
Marietta Sand Prairie	2014-07-24	Monarch	75
Marietta Sand Prairie	2014-08-03	Monarch	75
Marietta Sand Prairie	2014-08-05	Monarch	75
Marietta Sand Prairie	2014-08-05	Monarch	75
Marietta Sand Prairie	2014-08-05	Monarch	75
Marietta Sand Prairie	2014-08-14	Monarch	75
Marietta Sand Prairie	2014-08-14	Monarch	75
Marietta Sand Prairie	2014-08-14	Monarch	75
Marietta Sand Prairie	2014-08-16	Monarch	75
Marietta Sand Prairie	2014-08-16	Monarch	75
Marietta Sand Prairie	2014-08-22	Monarch	75
Harrier Marsh	2014-08-11	Monarch	75
Harrier Marsh	2014-08-11	Monarch	75
McCoy WMA	2014-08-04	Northern Pearly-eye	2.125
Harrier Marsh	2014-07-29	Orange Sulphur	0.5
Harrier Marsh	2014-07-29	Orange Sulphur	0.5
Harrier Marsh	2014-08-18	Orange Sulphur	0.5
Harrier Marsh	2014-08-18	Orange Sulphur	0.5
Harrier Marsh	2014-08-18	Orange Sulphur	0.5
Harrier Marsh	2014-08-18	Orange Sulphur	0.5
Harrier Marsh	2014-08-18	Orange Sulphur	0.5
Harrier Marsh	2014-08-21	Orange Sulphur	0.5
Harrier Marsh	2014-08-21	Orange Sulphur	0.5
Harrier Marsh	2014-08-21	Orange Sulphur	0.5
Marietta Sand Prairie	2014-08-02	Orange Sulphur	0.5
Marietta Sand Prairie	2014-08-02	Orange Sulphur	0.5
Marietta Sand Prairie	2014-08-03	Orange Sulphur	0.5
Marietta Sand Prairie	2014-08-17	Orange Sulphur	0.5
McCoy WMA	2014-07-29	Orange Sulphur	0.5
McCoy WMA	2014-07-29	Orange Sulphur	0.5
McCoy WMA	2014-07-29	Orange Sulphur	0.5
McCoy WMA	2014-07-29	Orange Sulphur	0.5
McCoy WMA	2014-07-30	Orange Sulphur	0.5
McCoy WMA	2014-07-30	Orange Sulphur	0.5
McCoy WMA	2014-07-30	Orange Sulphur	0.5
McCoy WMA	2014-07-30	Orange Sulphur	0.5
McCoy WMA	2014-07-30	Orange Sulphur	0.5
McCoy WMA	2014-07-30	Orange Sulphur	0.5
McCoy WMA	2014-08-02	Orange Sulphur	0.5
McCoy WMA	2014-08-02	Orange Sulphur	0.5
McCoy WMA	2014-08-02	Orange Sulphur	0.5
McCoy WMA	2014-08-02	Orange Sulphur	0.5
McCoy WMA	2014-08-04	Orange Sulphur	0.5
McCoy WMA	2014-08-04	Orange Sulphur	0.5
McCoy WMA	2014-08-04	Orange Sulphur	0.5
McCoy WMA	2014-08-11	Orange Sulphur	0.5
McCoy WMA	2014-08-13	Orange Sulphur	0.5
McCoy WMA	2014-08-13	Orange Sulphur	0.5
McCoy WMA	2014-08-13	Orange Sulphur	0.5
McCoy WMA	2014-08-19	Orange Sulphur	0.5
McCoy WMA	2014-08-19	Orange Sulphur	0.5
McCoy WMA	2014-08-19	Orange Sulphur	0.5
McCoy WMA	2014-08-21	Orange Sulphur	0.5
Harrier Marsh	2014-08-11	Orange Sulphur	0.5
Harrier Marsh	2014-08-11	Orange Sulphur	0.5
Harrier Marsh	2014-07-29	Orange Sulphur	1.375
Harrier Marsh	2014-07-29	Orange Sulphur	1.375
Harrier Marsh	2014-08-02	Orange Sulphur	1.375
Harrier Marsh	2014-08-18	Orange Sulphur	1.375
Harrier Marsh	2014-08-18	Orange Sulphur	1.375
Harrier Marsh	2014-08-21	Orange Sulphur	1.375
Harrier Marsh	2014-08-21	Orange Sulphur	1.375
Harrier Marsh	2014-08-21	Orange Sulphur	1.375
Marietta Sand Prairie	2014-08-02	Orange Sulphur	1.375
Marietta Sand Prairie	2014-08-02	Orange Sulphur	1.375
Marietta Sand Prairie	2014-08-14	Orange Sulphur	1.375
Marietta Sand Prairie	2014-08-14	Orange Sulphur	1.375
Marietta Sand Prairie	2014-08-16	Orange Sulphur	1.375
McCoy WMA	2014-07-29	Orange Sulphur	1.375
McCoy WMA	2014-07-29	Orange Sulphur	1.375
McCoy WMA	2014-07-30	Orange Sulphur	1.375
McCoy WMA	2014-07-30	Orange Sulphur	1.375
McCoy WMA	2014-07-30	Orange Sulphur	1.375
McCoy WMA	2014-07-30	Orange Sulphur	1.375
McCoy WMA	2014-07-30	Orange Sulphur	1.375
McCoy WMA	2014-08-02	Orange Sulphur	1.375
McCoy WMA	2014-08-02	Orange Sulphur	1.375
McCoy WMA	2014-08-02	Orange Sulphur	1.375
McCoy WMA	2014-08-04	Orange Sulphur	1.375
McCoy WMA	2014-08-04	Orange Sulphur	1.375
McCoy WMA	2014-08-04	Orange Sulphur	1.375
McCoy WMA	2014-08-04	Orange Sulphur	1.375
McCoy WMA	2014-08-11	Orange Sulphur	1.375
McCoy WMA	2014-08-13	Orange Sulphur	1.375
McCoy WMA	2014-08-13	Orange Sulphur	1.375
McCoy WMA	2014-08-19	Orange Sulphur	1.375
McCoy WMA	2014-08-19	Orange Sulphur	1.375
McCoy WMA	2014-08-19	Orange Sulphur	1.375
McCoy WMA	2014-08-21	Orange Sulphur	1.375
McCoy WMA	2014-08-21	Orange Sulphur	1.375
Harrier Marsh	2014-08-11	Orange Sulphur	1.375
Harrier Marsh	2014-08-11	Orange Sulphur	1.375
Harrier Marsh	2014-07-29	Orange Sulphur	2.125
Harrier Marsh	2014-07-29	Orange Sulphur	2.125
Harrier Marsh	2014-07-29	Orange Sulphur	2.125
Harrier Marsh	2014-08-05	Orange Sulphur	2.125
Harrier Marsh	2014-08-05	Orange Sulphur	2.125
Harrier Marsh	2014-08-18	Orange Sulphur	2.125
Harrier Marsh	2014-08-18	Orange Sulphur	2.125
Harrier Marsh	2014-08-21	Orange Sulphur	2.125
Harrier Marsh	2014-08-21	Orange Sulphur	2.125
Harrier Marsh	2014-08-21	Orange Sulphur	2.125
Marietta Sand Prairie	2014-08-02	Orange Sulphur	2.125
Marietta Sand Prairie	2014-08-14	Orange Sulphur	2.125
Marietta Sand Prairie	2014-08-16	Orange Sulphur	2.125
Marietta Sand Prairie	2014-08-16	Orange Sulphur	2.125
Marietta Sand Prairie	2014-08-17	Orange Sulphur	2.125
McCoy WMA	2014-07-29	Orange Sulphur	2.125
McCoy WMA	2014-07-29	Orange Sulphur	2.125
McCoy WMA	2014-07-30	Orange Sulphur	2.125
McCoy WMA	2014-07-30	Orange Sulphur	2.125
McCoy WMA	2014-07-30	Orange Sulphur	2.125
McCoy WMA	2014-07-30	Orange Sulphur	2.125
McCoy WMA	2014-07-30	Orange Sulphur	2.125
McCoy WMA	2014-07-30	Orange Sulphur	2.125
McCoy WMA	2014-07-30	Orange Sulphur	2.125
McCoy WMA	2014-08-02	Orange Sulphur	2.125
McCoy WMA	2014-08-02	Orange Sulphur	2.125
McCoy WMA	2014-08-02	Orange Sulphur	2.125
McCoy WMA	2014-08-02	Orange Sulphur	2.125
McCoy WMA	2014-08-02	Orange Sulphur	2.125
McCoy WMA	2014-08-02	Orange Sulphur	2.125
McCoy WMA	2014-08-02	Orange Sulphur	2.125
McCoy WMA	2014-08-04	Orange Sulphur	2.125
McCoy WMA	2014-08-04	Orange Sulphur	2.125
McCoy WMA	2014-08-11	Orange Sulphur	2.125
McCoy WMA	2014-08-11	Orange Sulphur	2.125
McCoy WMA	2014-08-13	Orange Sulphur	2.125
McCoy WMA	2014-08-19	Orange Sulphur	2.125
McCoy WMA	2014-08-21	Orange Sulphur	2.125
Harrier Marsh	2014-08-11	Orange Sulphur	2.125
Harrier Marsh	2014-08-11	Orange Sulphur	2.125
Harrier Marsh	2014-08-11	Orange Sulphur	2.125
Harrier Marsh	2014-07-29	Orange Sulphur	3.75
Harrier Marsh	2014-08-02	Orange Sulphur	3.75
Harrier Marsh	2014-08-02	Orange Sulphur	3.75
Harrier Marsh	2014-08-05	Orange Sulphur	3.75
Harrier Marsh	2014-08-18	Orange Sulphur	3.75
Harrier Marsh	2014-08-18	Orange Sulphur	3.75
Harrier Marsh	2014-08-18	Orange Sulphur	3.75
Harrier Marsh	2014-08-18	Orange Sulphur	3.75
Marietta Sand Prairie	2014-08-03	Orange Sulphur	3.75
Marietta Sand Prairie	2014-08-17	Orange Sulphur	3.75
Marietta Sand Prairie	2014-08-17	Orange Sulphur	3.75
Marietta Sand Prairie	2014-08-17	Orange Sulphur	3.75
McCoy WMA	2014-07-29	Orange Sulphur	3.75
McCoy WMA	2014-07-29	Orange Sulphur	3.75
McCoy WMA	2014-07-29	Orange Sulphur	3.75
McCoy WMA	2014-07-29	Orange Sulphur	3.75
McCoy WMA	2014-07-29	Orange Sulphur	3.75
McCoy WMA	2014-07-29	Orange Sulphur	3.75
McCoy WMA	2014-07-30	Orange Sulphur	3.75
McCoy WMA	2014-07-30	Orange Sulphur	3.75
McCoy WMA	2014-07-30	Orange Sulphur	3.75
McCoy WMA	2014-07-30	Orange Sulphur	3.75
McCoy WMA	2014-07-30	Orange Sulphur	3.75
McCoy WMA	2014-07-30	Orange Sulphur	3.75
McCoy WMA	2014-07-30	Orange Sulphur	3.75
McCoy WMA	2014-07-30	Orange Sulphur	3.75
McCoy WMA	2014-08-02	Orange Sulphur	3.75
McCoy WMA	2014-08-02	Orange Sulphur	3.75
McCoy WMA	2014-08-02	Orange Sulphur	3.75
McCoy WMA	2014-08-04	Orange Sulphur	3.75
McCoy WMA	2014-08-04	Orange Sulphur	3.75
McCoy WMA	2014-08-11	Orange Sulphur	3.75
McCoy WMA	2014-08-13	Orange Sulphur	3.75
McCoy WMA	2014-08-13	Orange Sulphur	3.75
McCoy WMA	2014-08-19	Orange Sulphur	3.75
McCoy WMA	2014-08-19	Orange Sulphur	3.75
McCoy WMA	2014-08-21	Orange Sulphur	3.75
Harrier Marsh	2014-08-11	Orange Sulphur	3.75
Harrier Marsh	2014-08-11	Orange Sulphur	3.75
Harrier Marsh	2014-07-29	Orange Sulphur	7.5
Harrier Marsh	2014-07-30	Orange Sulphur	7.5
Harrier Marsh	2014-07-30	Orange Sulphur	7.5
Harrier Marsh	2014-07-30	Orange Sulphur	7.5
Harrier Marsh	2014-08-02	Orange Sulphur	7.5
Harrier Marsh	2014-08-02	Orange Sulphur	7.5
Harrier Marsh	2014-08-05	Orange Sulphur	7.5
Harrier Marsh	2014-08-05	Orange Sulphur	7.5
Harrier Marsh	2014-08-18	Orange Sulphur	7.5
Harrier Marsh	2014-08-18	Orange Sulphur	7.5
Marietta Sand Prairie	2014-07-24	Orange Sulphur	7.5
Marietta Sand Prairie	2014-08-02	Orange Sulphur	7.5
Marietta Sand Prairie	2014-08-02	Orange Sulphur	7.5
Marietta Sand Prairie	2014-08-03	Orange Sulphur	7.5
Marietta Sand Prairie	2014-08-14	Orange Sulphur	7.5
Marietta Sand Prairie	2014-08-17	Orange Sulphur	7.5
Marietta Sand Prairie	2014-08-17	Orange Sulphur	7.5
Marietta Sand Prairie	2014-08-22	Orange Sulphur	7.5
McCoy WMA	2014-07-29	Orange Sulphur	7.5
McCoy WMA	2014-07-29	Orange Sulphur	7.5
McCoy WMA	2014-07-30	Orange Sulphur	7.5
McCoy WMA	2014-07-30	Orange Sulphur	7.5
McCoy WMA	2014-07-30	Orange Sulphur	7.5
McCoy WMA	2014-07-30	Orange Sulphur	7.5
McCoy WMA	2014-07-30	Orange Sulphur	7.5
McCoy WMA	2014-08-02	Orange Sulphur	7.5
McCoy WMA	2014-08-02	Orange Sulphur	7.5
McCoy WMA	2014-08-02	Orange Sulphur	7.5
McCoy WMA	2014-08-04	Orange Sulphur	7.5
McCoy WMA	2014-08-04	Orange Sulphur	7.5
McCoy WMA	2014-08-04	Orange Sulphur	7.5
McCoy WMA	2014-08-11	Orange Sulphur	7.5
McCoy WMA	2014-08-11	Orange Sulphur	7.5
McCoy WMA	2014-08-11	Orange Sulphur	7.5
McCoy WMA	2014-08-13	Orange Sulphur	7.5
McCoy WMA	2014-08-13	Orange Sulphur	7.5
McCoy WMA	2014-08-13	Orange Sulphur	7.5
McCoy WMA	2014-08-13	Orange Sulphur	7.5
McCoy WMA	2014-08-19	Orange Sulphur	7.5
McCoy WMA	2014-08-19	Orange Sulphur	7.5
McCoy WMA	2014-08-21	Orange Sulphur	7.5
Harrier Marsh	2014-07-29	Orange Sulphur	17.5
Harrier Marsh	2014-07-29	Orange Sulphur	17.5
Harrier Marsh	2014-07-30	Orange Sulphur	17.5
Harrier Marsh	2014-07-30	Orange Sulphur	17.5
Harrier Marsh	2014-08-02	Orange Sulphur	17.5
Harrier Marsh	2014-08-02	Orange Sulphur	17.5
Harrier Marsh	2014-08-05	Orange Sulphur	17.5
Harrier Marsh	2014-08-05	Orange Sulphur	17.5
Harrier Marsh	2014-08-05	Orange Sulphur	17.5
Marietta Sand Prairie	2014-08-02	Orange Sulphur	17.5
Marietta Sand Prairie	2014-08-02	Orange Sulphur	17.5
Marietta Sand Prairie	2014-08-02	Orange Sulphur	17.5
Marietta Sand Prairie	2014-08-02	Orange Sulphur	17.5
Marietta Sand Prairie	2014-08-03	Orange Sulphur	17.5
Marietta Sand Prairie	2014-08-14	Orange Sulphur	17.5
McCoy WMA	2014-07-29	Orange Sulphur	17.5
McCoy WMA	2014-07-29	Orange Sulphur	17.5
McCoy WMA	2014-07-29	Orange Sulphur	17.5
McCoy WMA	2014-07-30	Orange Sulphur	17.5
McCoy WMA	2014-07-30	Orange Sulphur	17.5
McCoy WMA	2014-07-30	Orange Sulphur	17.5
McCoy WMA	2014-07-30	Orange Sulphur	17.5
McCoy WMA	2014-07-30	Orange Sulphur	17.5
McCoy WMA	2014-07-30	Orange Sulphur	17.5
McCoy WMA	2014-08-02	Orange Sulphur	17.5
McCoy WMA	2014-08-02	Orange Sulphur	17.5
McCoy WMA	2014-08-02	Orange Sulphur	17.5
McCoy WMA	2014-08-02	Orange Sulphur	17.5
McCoy WMA	2014-08-04	Orange Sulphur	17.5
McCoy WMA	2014-08-11	Orange Sulphur	17.5
McCoy WMA	2014-08-11	Orange Sulphur	17.5
McCoy WMA	2014-08-11	Orange Sulphur	17.5
McCoy WMA	2014-08-13	Orange Sulphur	17.5
McCoy WMA	2014-08-13	Orange Sulphur	17.5
McCoy WMA	2014-08-19	Orange Sulphur	17.5
McCoy WMA	2014-08-19	Orange Sulphur	17.5
McCoy WMA	2014-08-19	Orange Sulphur	17.5
Harrier Marsh	2014-08-11	Orange Sulphur	17.5
Harrier Marsh	2014-07-29	Orange Sulphur	37.5
Harrier Marsh	2014-07-29	Orange Sulphur	37.5
Harrier Marsh	2014-07-30	Orange Sulphur	37.5
Harrier Marsh	2014-08-05	Orange Sulphur	37.5
Harrier Marsh	2014-08-05	Orange Sulphur	37.5
Harrier Marsh	2014-08-18	Orange Sulphur	37.5
Marietta Sand Prairie	2014-08-02	Orange Sulphur	37.5
McCoy WMA	2014-07-29	Orange Sulphur	37.5
McCoy WMA	2014-07-29	Orange Sulphur	37.5
McCoy WMA	2014-07-29	Orange Sulphur	37.5
McCoy WMA	2014-07-29	Orange Sulphur	37.5
McCoy WMA	2014-07-30	Orange Sulphur	37.5
McCoy WMA	2014-07-30	Orange Sulphur	37.5
McCoy WMA	2014-07-30	Orange Sulphur	37.5
McCoy WMA	2014-07-30	Orange Sulphur	37.5
McCoy WMA	2014-08-02	Orange Sulphur	37.5
McCoy WMA	2014-08-02	Orange Sulphur	37.5
McCoy WMA	2014-08-02	Orange Sulphur	37.5
McCoy WMA	2014-08-04	Orange Sulphur	37.5
McCoy WMA	2014-08-04	Orange Sulphur	37.5
McCoy WMA	2014-08-11	Orange Sulphur	37.5
McCoy WMA	2014-08-11	Orange Sulphur	37.5
McCoy WMA	2014-08-11	Orange Sulphur	37.5
McCoy WMA	2014-08-11	Orange Sulphur	37.5
McCoy WMA	2014-08-13	Orange Sulphur	37.5
McCoy WMA	2014-08-13	Orange Sulphur	37.5
McCoy WMA	2014-08-19	Orange Sulphur	37.5
McCoy WMA	2014-08-19	Orange Sulphur	37.5
McCoy WMA	2014-08-19	Orange Sulphur	37.5
Rock Creek Marsh	2014-08-03	Orange Sulphur	37.5
Rock Creek Marsh	2014-08-04	Orange Sulphur	37.5
Harrier Marsh	2014-08-11	Orange Sulphur	37.5
Harrier Marsh	2014-08-02	Orange Sulphur	75
McCoy WMA	2014-07-29	Orange Sulphur	75
McCoy WMA	2014-07-29	Orange Sulphur	75
McCoy WMA	2014-07-30	Orange Sulphur	75
McCoy WMA	2014-07-30	Orange Sulphur	75
McCoy WMA	2014-08-02	Orange Sulphur	75
McCoy WMA	2014-08-02	Orange Sulphur	75
McCoy WMA	2014-08-04	Orange Sulphur	75
McCoy WMA	2014-08-04	Orange Sulphur	75
McCoy WMA	2014-08-11	Orange Sulphur	75
McCoy WMA	2014-08-11	Orange Sulphur	75
McCoy WMA	2014-08-11	Orange Sulphur	75
McCoy WMA	2014-08-11	Orange Sulphur	75
McCoy WMA	2014-08-11	Orange Sulphur	75
McCoy WMA	2014-08-13	Orange Sulphur	75
McCoy WMA	2014-08-13	Orange Sulphur	75
McCoy WMA	2014-08-13	Orange Sulphur	75
McCoy WMA	2014-08-13	Orange Sulphur	75
McCoy WMA	2014-08-19	Orange Sulphur	75
McCoy WMA	2014-08-19	Orange Sulphur	75
McCoy WMA	2014-08-21	Orange Sulphur	75
Harrier Marsh	2014-08-11	Orange Sulphur	75
Harrier Marsh	2014-08-21	Painted Lady	0.5
Harrier Marsh	2014-08-21	Painted Lady	0.5
Harrier Marsh	2014-08-21	Painted Lady	0.5
Marietta Sand Prairie	2014-08-14	Painted Lady	0.5
Marietta Sand Prairie	2014-08-22	Painted Lady	0.5
Marietta Sand Prairie	2014-08-22	Painted Lady	0.5
Marietta Sand Prairie	2014-08-22	Painted Lady	0.5
Marietta Sand Prairie	2014-08-22	Painted Lady	0.5
Marietta Sand Prairie	2014-08-22	Painted Lady	0.5
Marietta Sand Prairie	2014-08-22	Painted Lady	0.5
Harrier Marsh	2014-08-11	Painted Lady	0.5
Harrier Marsh	2014-08-21	Painted Lady	1.375
Harrier Marsh	2014-08-21	Painted Lady	1.375
Marietta Sand Prairie	2014-08-14	Painted Lady	1.375
Marietta Sand Prairie	2014-08-22	Painted Lady	1.375
[truncated: 271 more rows]
