# Supplementary material for: Evaluating differences in density estimation for central Iowa butterflies using two methodologies
Source: PeerJ journal article supplement (doi:10.7717/peerj.16165), 2023-10-09
Supplement: PYsurveys.xlsx [file PYsurveys.xlsx]

## Sheet: Sheet1
SurveyDate	PropName	Acadian Hairstreak	American Lady	American Snout	Aphrodite Fritillary	Banded Hairstreak	Black Dash	Black Swallowtail	Broad-winged Skipper	Bronze Copper	Buckeye	Byssus Skipper	Cabbage White	Checkered White	Clouded Sulphur	Cloudless Sulphur	Common Checkered-Skipper	Common Ringlet	Common Roadside Skipper	Common Sootywing	Common Wood-Nymph	Coral Hairstreak	Crossline Skipper	Dainty Sulphur	Dakota Skipper	Delaware Skipper	Dion Skipper	Dun Skipper	Dusted Skipper	Eastern Comma	Eastern Tailed-Blue	Eastern Tiger Swallowtail	Edwards' Hairstreak	European Skipper	Eyed Brown	Fiery Skipper	Giant Swallowtail	Goatweed Leafwing	Gorgone Checkerspot	Gray Comma	Gray Copper	Gray Hairstreak	Great Spangled Fritillary	Hackberry Emperor	Harvester	Hobomok Skipper	Horace's Duskywing	Juniper Hairstreak	Least Skipper
2007-06-14	Harrier Marsh							2							9																1
2007-06-20	McCoy WA		1	1											14																1												2
2007-07-18	Harrier Marsh							2			1				4																												2
2007-08-17	McCoy WA							1			1		1		4									2							9
2008-05-15	McCoy WA										1		2		3											2					5																		7
2008-06-30	Harrier Marsh
2008-07-03	McCoy WA												1		14																3
2008-07-21	Harrier Marsh							1																							1
2008-08-03	McCoy WA												3		16																6														1
2008-08-11	Harrier Marsh																																																7
2008-08-22	McCoy WA										1				2											2					5
2008-08-28	Harrier Marsh							1							2																																		1
2009-06-17	McCoy WA												3		3																												2
2009-06-22	Harrier Marsh														2
2009-07-13	Harrier Marsh
2009-07-13	McCoy WA												1		1					1	1										1												3
2009-07-30	Harrier Marsh														3																																		1
2009-07-30	McCoy WA										1		2		4																7	1
2009-08-23	Harrier Marsh																																																1
2009-08-28	McCoy WA												4								1
2010-06-22	McCoy WA							1					5		17																													2
2010-07-02	Harrier Marsh												1		5																												1
2010-07-16	McCoy WA										1		3		2																												2
2010-07-21	Harrier Marsh														3
2010-07-29	Harrier Marsh														7																																		1
2010-07-29	McCoy WA												1		4																												1
2010-08-18	McCoy WA														2
2010-08-19	Harrier Marsh										1				1
2011-05-26	McCoy WA
2011-06-01	Harrier Marsh
2011-06-24	Harrier Marsh												1																		2																		2
2011-06-24	McCoy WA										2		1		11																1												32	7
2011-06-27	Rock Creek WMA																																																15
2011-07-11	Rock Creek WMA							2																																									2
2011-07-19	McCoy WA												2		1																5	1
2011-07-21	Harrier Marsh												1																														1
2011-07-27	Rock Creek WMA												1																	2																			4
2011-08-03	Harrier Marsh														2																1
2011-08-03	McCoy WA							1					2		21																11	1											1
2011-08-10	Rock Creek WMA										1		5																																				49
2012-06-01	McCoy WA										1		1		5																10			1									28
2012-06-21	Harrier Marsh														1
2012-06-22	McCoy WA						1								3		1														3			1			1					5	6
2012-07-03	Rock Creek WMA												2																																				4
2012-07-20	Harrier Marsh														1																																		1
2012-07-20	McCoy WA														3		1							2							11						1
2012-07-23	Rock Creek WMA
2012-08-14	Harrier Marsh
2012-08-14	McCoy WA														1																18											2
2013-06-13	Rock Creek WMA
2013-06-25	McCoy WA										2				3																39
2013-07-08	Rock Creek WMA																									1					1																		1
2013-07-11	Harrier Marsh																														1
2013-07-11	McCoy WA										2				2																4
2013-07-24	Rock Creek WMA												1
2013-07-29	Harrier Marsh																														3
2013-07-29	McCoy WA										1				2																13
2013-08-16	Harrier Marsh							2																																									1
2013-08-16	McCoy WA										2																				2
[truncated: 48 more columns]
